# Skewed X inactivation in genetically diverse mice is associated with recurrent copy number changes at the *Xce* locus

Kathie Y Sun<sup>\*,†</sup>, Daniel Oreper<sup>\*,†</sup>, Sarah A Schoenrock<sup>\*,‡</sup>, Rachel McMullan<sup>\*,§</sup>, Paola Giusti-Rodríguez<sup>\*</sup>, Vasyl Zhabotynsky<sup>\*\*</sup>, Darla R Miller<sup>\*,††</sup>, Lisa M Tarantino<sup>\*,‡‡</sup>, Fernando Pardo-Manuel de Villena<sup>\*,††,1</sup> and William Valdar<sup>\*,††,1</sup>

<sup>\*</sup>Department of Genetics, <sup>†</sup>Bioinformatics and Computational Biology Curriculum, <sup>‡</sup>Neuroscience Curriculum, <sup>§</sup>Genetics and Molecular Biology Curriculum, <sup>\*\*</sup>Department of Biostatistics, <sup>††</sup>Lineberger Comprehensive Cancer Center, School of Medicine, University of North Carolina, Chapel Hill, NC, <sup>‡‡</sup>Division of Pharmacotherapy and Experimental Therapeutics, Eshelman School of Pharmacy, University of North Carolina, Chapel Hill, NC  
ORCID IDs: 0000-0003-1200-452X (K.Y.S.); 0000-0003-4569-5160 (D.O.); 0000-0001-7345-444X (S.A.S.); 0000-0003-0297-4549 (R.M.); 0000-0002-1921-1305 (P.G.-R.); 0000-0003-1575-5732 (V.Z.); 0000-0002-0781-7254 (D.R.M.); 0000-0001-9984-2600 (L.M.T.); 0000-0002-5738-5795 (F.P.-M.d.V.); 0000-0002-2419-0430 (W.V.);

1 **ABSTRACT** Female mammals are functional mosaics of their parental X-linked gene expression due to X chromosome  
2 inactivation (XCI). This process inactivates one copy of the X chromosome in each cell during embryogenesis and that state  
3 is maintained clonally through mitosis. In mice, the choice of which parental X chromosome remains active is determined by  
4 the X chromosome controlling element (*Xce*), which has been mapped to a 176 kb candidate interval. A series of functional  
5 *Xce* alleles has been characterized or inferred for classical inbred strains based on biased, or skewed, inactivation of the  
6 parental X chromosomes in crosses between strains. To further explore the function-structure basis and location of the *Xce*,  
7 we measured allele-specific expression of X-linked genes in a large population of F1 females generated from Collaborative  
8 Cross strains. Using published sequence data and applying a Bayesian “Pólya urn” model of XCI skew, we report two major  
9 findings. First, inter-individual variability in XCI suggests mouse epiblasts on average contain 20-30 cells contributing to brain.  
10 Second, NOD/ShiLtJ has a novel and unique functional allele, *Xce<sup>f</sup>*, that is the weakest in the *Xce* allelic series. Despite  
11 phylogenetic analysis confirming that NOD/ShiLtJ carries a haplotype almost identical to the well-characterized C57BL/6J  
12 (*Xce<sup>b</sup>*), we observed unexpected patterns of XCI skewing in females carrying the NOD/ShiLtJ haplotype within the *Xce*. Copy  
13 number variation is common at the *Xce* locus and we conclude that the observed allelic series is a product of independent and  
14 recurring duplications shared between weak *Xce* alleles.

15 **KEYWORDS** dosage compensation; multiparent population; Bayesian hierarchical modeling; copy number variation.

## 1 Introduction

2 **A**lthough X chromosome inactivation (XCI) was first de-  
3 scribed in the early 1960s (Lyon 1961; Beutler *et al.* 1962),  
4 the genetic influences and molecular mechanisms underlying

this phenomenon are still incompletely understood. Embryonic stem cells of female placental mammals undergo random XCI, a process that transcriptionally inactivates one of the two X chromosomes early in development (Avner and Heard 2001; Disteche and Berletch 2015). Subsequent daughter cells carry on the initial decision, forming clusters of cells in which either the maternal or paternal X is actively transcribed. Consequently, female mammals are unique mosaics of parental X chromosome activity. XCI ensures that expression of genes on the X chromosome is functionally equalized with those of males as a form of dosage compensation.

At the epiblast stage, each embryonic cell randomly and in-

Manuscript compiled: Saturday 14<sup>th</sup> November, 2020

<sup>1</sup>These authors contributed equally to this work.

<sup>1</sup>Corresponding authors: 120 Mason Farm Rd, 5000D Genetic Medicine Building, Chapel Hill, NC 27599-7264. E-mails: fernando@med.unc.edu, william.valdar@unc.edu.

1 dependently inactivates one of the parental X chromosomes and  
 2 locks in its cellular fate (Nesterova *et al.* 2001; Okamoto *et al.*  
 3 2004). This random selection occurs at around embryonic day  
 4 E5.5 (Takagi *et al.* 1982; Rastan 1982), prior to differentiation into  
 5 the three major embryonic germ layers and when there are 120-  
 6 250 cells comprising the epiblast (Snow 1977). The inactivated X  
 7 chromosome (Xi) undergoes major reorganization and becomes  
 8 condensed and heterochromatic, stabilizing gene repression in  
 9 subsequent somatic cells (Wutz 2011; Nora *et al.* 2012). Reg-  
 10 ulation of XCI is carried out in part by *Xist*, a *cis*-acting long  
 11 noncoding RNA (lncRNA) that is transcribed only from the inacti-  
 12 vated X (Xi) (Brown *et al.* 1991). The major X inactivation center  
 13 (*Xic*) extends across a 450 kb multi-function region containing  
 14 many elements responsible for the complex molecular cascade  
 15 orchestrating XCI, including *Xist* and other *cis* elements such as  
 16 *Tsix* and *Xite* (Lee *et al.* 1996; Cattanach *et al.* 1970; Ogawa and  
 17 Lee 2003).

18 The role played by *Xist* is necessary but not sufficient to fully  
 19 explain XCI, leading researchers to explore the larger landscape  
 20 of *cis* and *trans* regulators, chromatin modifiers, and protein  
 21 complexes that may comprise the *Xist* interactome (Dossin *et al.*  
 22 2020; Penny *et al.* 1996; Brockdorff *et al.* 1991; Giorgetti *et al.* 2016;  
 23 Minajigi *et al.* 2015). Control of XCI is inherently genetic and thus  
 24 heterogeneity in the genetic architecture of these elements may  
 25 affect the expression of *Xist* and its antisense counterpart, *Tsix*,  
 26 leading to disruption of the machinery controlling the counting,  
 27 choice, and silencing of the inherited X chromosomes. *Xite* is one  
 28 such example of a region harboring both allelic heterogeneity  
 29 and intergenic transcription start sites resulting in differential  
 30 regulation of *Tsix* expression (Ogawa and Lee 2003). In turn,  
 31 *Tsix* is monoallelically expressed from the active X (Xa) and  
 32 blocks *Xist* accumulation, thus ensuring the future Xa (Lee *et al.*  
 33 1999a,b).

34 XCI is ostensibly random, so the *a priori* distribution of mater-  
 35 nal and paternal Xa is expected to be 50:50. Nevertheless,  
 36 non-random biases between mouse lines have been observed  
 37 for decades (Cattanach and Isaacson 1967; Cattanach 1970; Cat-  
 38 tanach *et al.* 1970), leading researchers to postulate that beyond  
 39 the wholesale control of inactivation, preferential skewing for  
 40 one parental set of X chromosomes over the other may also be  
 41 under genetic control. Skewing can take two forms. Primary  
 42 skewing is when the parental chromosomes are inactivated in  
 43 unequal proportion from the outset (Percec *et al.* 2002). Sec-  
 44 ondary skewing arises as a form of selection, where paternal  
 45 and maternal chromosomes are initially inactivated at random  
 46 but the embryonic cells carrying them undergo unbalanced rates  
 47 of replication or death (Minks *et al.* 2008; Takagi 1980). The  
 48 hallmarks of secondary skewing also differ, in that it can be  
 49 tissue-specific and occur at any point during development. In  
 50 the event of a beneficial or deleterious mutation being carried on  
 51 the chromosome inherited from one parent, secondary skewing  
 52 could be advantageous.

53 Primary skewing in mice has been associated with an allelic  
 54 series on the X chromosome named the X chromosome control-  
 55 ling element (*Xce*). Five known functional *Xce* alleles have been  
 56 described from weakest to strongest, *i.e.*  $Xce^d > Xce^e > Xce^b$   
 57  $> Xce^c > Xce^a$  (Cattanach *et al.* 1972; Cattanach and Papworth  
 58 1981). Under this paradigm, X chromosomes with  $Xce^d$  are the  
 59 least likely to remain active, and when found in female heterozy-  
 60 gotes alongside the  $Xce^c$  allele, skewing as extreme as 20:80 is ex-  
 61 pected (Figure 1). These allelic designations are well-recognized  
 62 and have been consistently observed in inbred mouse strains

63 exhibiting replicable skews in X inactivation ratio. Among the  
 64 remaining unknown features of the *Xce*, however, are the exact  
 65 size and location of the region and the nature of genetic variation  
 66 that leads to the phenomenon.

67 A natural starting place to search for the *Xce* would be within  
 68 the *Xic*. Control of XCI was initially mapped to a genomic region  
 69 which overlaps the *Xic*, and *Xist* was an early candidate for the  
 70 *Xce*. Using translocated coat color genes, Cattanach and collabor-  
 71 ators placed the control region between two markers for Tabby  
 72 (Ta) and Mottled (Mo) coat colors (Figure 2). Upon discovery of  
 73 *Tsix* and *Xite*, allelic heterogeneity across the *Xic* was suggested  
 74 as a candidate for *Xce* and as an explanation for the phenotypic  
 75 breadth of skewing observed in mice (Ogawa and Lee 2003).  
 76 However, more recent work in the last two decades demonstrate  
 77 that the *Xce* does not overlap the *Xic*, suggesting that another  
 78 separate region also participates in XCI. Further refinements  
 79 over the the decades (Cattanach and Papworth 1981; Simmler  
 80 *et al.* 1993; Chadwick *et al.* 2006; Calaway *et al.* 2013) have  
 81 narrowed down the region to a 176 kb minimum interval about  
 82 500 kb proximal to *Xic*, rich with multiple structural variants  
 83 including duplications and inversions.

84 Researchers have thus generally coalesced around the theory  
 85 that the *Xce*, as first defined by Cattanach (1970), describes a  
 86 region on the X chromosome proximal to the *Xic* that influences  
 87 XCI and skewing phenotypes with a number of functional alle-  
 88 les. Nevertheless, there remains uncertainty about the nature,  
 89 function, and mechanisms of how *Xce* influences XCI, or if XCI is  
 90 entirely controlled by a single locus. A complete characterization  
 91 of *Xce* and its influence on XCI remains elusive.

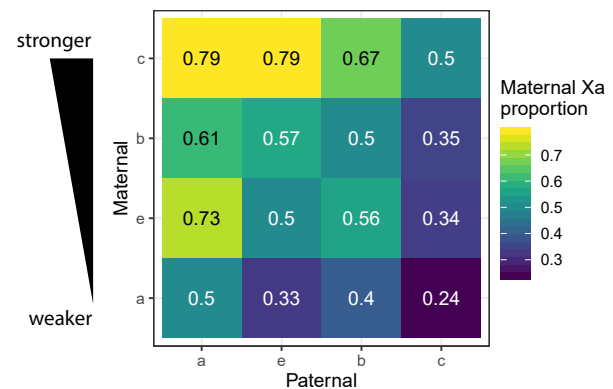

Figure 1 Estimate of maternal Xa proportion given parental *Xce* alleles from previously published work (Calaway *et al.* 2013; Sheedy 2012; Thorvaldsen *et al.* 2012; Wang *et al.* 2010; Chadwick *et al.* 2006; Plenge *et al.* 2000)

92 More recent work incorporating genetic diversity in F1 mouse  
 93 crosses confirmed the broad patterns of the *Xce* alleles and support  
 94 the importance and functionality of the region in XCI; this  
 95 is despite difficulty in pinpointing the functional variation and  
 96 specific gene(s) causing the skew. The narrowest putative *Xce*  
 97 region to date was reported by our group in Calaway *et al.* (2013)  
 98 using F1 crosses of classical inbred mouse strains, wild-derived  
 99 strains, and other *Mus* species. Those results showed that the  
 100 *Xce* region, localized to an at-minimum 176 kb candidate region  
 101 consistent with previously described intervals, confers skewed  
 102 XCI in patterns compatible with the known paradigm (Chad-  
 103 wick *et al.* 2006). The minimum *Xce* interval comprises a series of  
 104 duplications and inversions and Calaway *et al.* (2013) proposed  
 105 that copy number variations (CNVs) may play a role in XCI

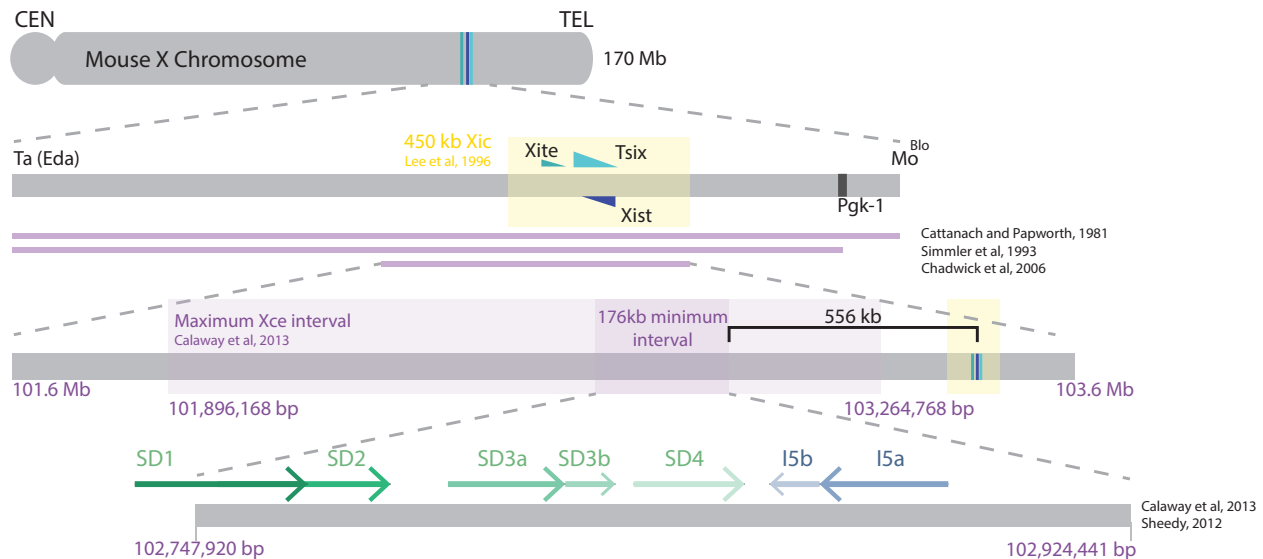

**Figure 2** Physical map of the mouse X chromosome, highlighting locations of historical candidate *Xce* intervals. Zoomed in region (bottom) depicts the segmental duplications (SD) and inversions (I) examined in this study.

1 skewing (Figure 2). Increased genetic diversity made possible  
 2 the discovery of another functional allele in the series, *Xce<sup>e</sup>*, ob-  
 3 served in inbred PWK/PhJ mice (Crowley *et al.* 2015; Calaway  
 4 *et al.* 2013; Lenarcic *et al.* 2018).

5 In addition, Thorvaldsen *et al.* (2012) demonstrated that mice  
 6 with recombinant breakpoints across *Xce* had significantly dif-  
 7 ferent XCI ratios than either control populations of homozygous  
 8 or non-backcrossed F1 mice. This finding highlights the diffi-  
 9 culty of identifying one single region that explains the entire  
 10 phenomenon and confers the totality of XCI control.

11 In this study we take advantage of the fairly narrow putative  
 12 *Xce* interval to explore XCI in a genetically heterogeneous mouse  
 13 population. We further define and characterize the role of *Xce*,  
 14 and in particular of CNVs, in XCI skewing using 266 female mice  
 15 from 28 F1 crosses of the Collaborative Cross (CC) multiparental  
 16 mouse population (Collaborative Cross Consortium 2012; Srivas-  
 17 tava *et al.* 2017). The CC are a panel of replicable and genetically  
 18 diverse inbred mouse strains, each derived from an independent  
 19 cross of eight inbred strains representing the three major *Mus*  
 20 *musculus* subspecies: *domesticus* (A/J, C57BL/6J, 129S1/SvImJ),  
 21 NOD/ShiLtJ, NZO/HILtJ, WSB/EiJ), *castaneus* (CAST/EiJ) and  
 22 *musculus* (PWK/PhJ). Each CC strain possesses genome-wide  
 23 contributions from the founder strains due to mixing that oc-  
 24 curred during rounds of breeding, leading to functional genetic  
 25 variation and phenotypic breadth. Generations of sib-pair mat-  
 26 ing resulted in inbred haplotype blocks, allowing for replicates  
 27 of each CC strain.

28 Most of the previous studies quantifying XCI make use of  
 29 either 1) F1 hybrids of classical inbred mouse strains, or 2) back-  
 30 crossed mouse populations on an inbred background with spe-  
 31 cific and deliberate introductions of one other strain to probe  
 32 the boundaries of *Xce*. With increased heterozygosity in the  
 33 genetic background of our CC-derived sample population, we  
 34 can tease apart the effects of *Xce* independent from the genetic  
 35 background. As a result, any observed XCI will be directly at-  
 36 tributable to primary skewing due to *Xce* because other loci on  
 37 the X chromosome will be shuffled among the crosses. Increased  
 38 genetic heterogeneity in our sample population also allows us to  
 39 describe further phenotypic heterogeneity in XCI ratios beyond

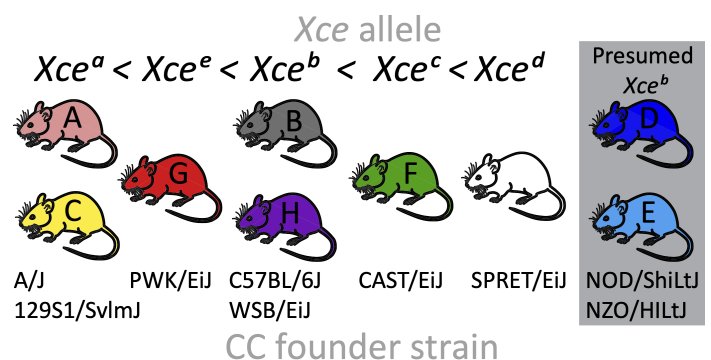

**Figure 3** *Mus musculus* strains and their observed or predicted *Xce* alleles. CC founder one-letter code and color corresponds to CC labeling convention. Alleles are ordered in terms of strength. NOD and NZO are presumed *Xce<sup>b</sup>*.

the known *Xce* alleles (Figure 3).

Two of the inbred laboratory strains used in generating the CC, NOD/ShiLtJ and NZO/HILtJ (henceforth referred to as NOD and NZO, respectively), have not had their *Xce* alleles characterized through crosses; however, both were predicted to be *Xce<sup>b</sup>* due to haplotype similarity with C57BL/6J based on dense genotyping (Calaway *et al.* 2013). Our results interrogate the accuracy of these predictions based on observed XCI skew in F1 females with sequence derived from NOD or NZO spanning the *Xce*.

Our estimation of XCI skewing is more precise and generalizable compared with much of the XCI literature for two reasons. First, we incorporate X chromosome-wide expression data by quantifying from global RNA-seq. Previous work, by contrast, has generally quantified XCI using allele-specific expression (ASE) measured at a few known genes, which may present biases and inaccurate ratios due to inactivation escape, *cis* regulatory elements, or various confounding variables that are not due to XCI itself. Second, we report precise measures of uncertainty about our estimates using a Bayesian hierarchical statistical model that accounts for multiple sources of information. Chromosome-

1 wide ASE data presents more opportunities for sophisticated  
 2 statistical modeling to assess XCI, and there are relatively few  
 3 examples of XCI proportion modeled hierarchically as a beta-  
 4 distributed random variable (Larson *et al.* 2017; Lenarcic *et al.*  
 5 2018). This allows us to largely account for other subtle factors  
 6 that are known to play a role, such as parent-of-origin effects  
 7 (POE) in XCI whereby the paternal X (Xp) is predisposed to  
 8 slightly lower levels of activation regardless of *Xce* allele (Wang  
 9 *et al.* 2010; Calaway *et al.* 2013; Lenarcic *et al.* 2018). The model  
 10 also, in accounting for variability in XCI among genetically identi-  
 11 cal individuals, estimates the effective number of epiblast cells  
 12 at the point of X inactivation that contribute to the organ on  
 13 which the RNA-seq is collected.

14 Another key resource we take advantage of is recently-  
 15 published high coverage whole genome sequences of the CC  
 16 strains (Srivastava *et al.* 2017; Shorter *et al.* 2019), which we  
 17 used to specifically and accurately quantify CNVs across the  
 18 *Xce*. By quantifying targeted, short reads, we confirm that this  
 19 region hosts highly recurring sequences which appears to have  
 20 implications for *Xce* function, and consequently, skewed XCI  
 21 proportions in mouse crosses. Our characterization of the *Xce*  
 22 region utilizes the most genetically diverse mouse population to  
 23 estimate XCI to date and incorporates data from next-generation  
 24 sequencing to determine ASE, providing a comprehensive quan-  
 25 tification of chromosome-wide skewing.

## 26 Materials and Methods

### 27 Notation

28 Throughout this article, we denote each F1 sample by Strain  
 29 1/Strain 2, where counts from Strain 1 comprise the numerator  
 30 of the XCI proportion, *i.e.*  $\frac{\text{Strain 1}}{\text{Strain 1} + \text{Strain 2}}$ . Reciprocal crosses are  
 31 denoted *a* or *b*, for CC001♀ × CC011♂ and CC011♂ × CC001♀, re-  
 32 spectively. These designations were made arbitrarily, but remain  
 33 consistent throughout the study. Table S1 provides a summary  
 34 of the CC strains and the F1 crosses.

### 35 Mouse breeding populations and sample collection

36 The process of generating CC strains has been previously de-  
 37 scribed in detail by Collaborative Cross Consortium (2012). CC  
 38 mice were purchased from the Systems Genetics Core Facility  
 39 (SGCF) at the University of North Carolina (UNC). This study  
 40 includes data from 266 samples derived from a total of 29 CC  
 41 strains (Figure 4) used to produce 28 F1 recombinant inbred in-  
 42 tercross lines (CC-RIX). Data for this study was generated from  
 43 two CC-RIX sample populations (SP). Heterozygosity present  
 44 in the RIX lines allows us to both precisely measure ASE by  
 45 comparing the expression of transcripts with allele A versus  
 46 transcripts with allele B from mice that inherit the genotype AB.

47 **SP1:** This population was developed to identify strain, POE  
 48 and perinatal maternal diet effects on gene expression and behav-  
 49 ioral phenotypes in adulthood by utilizing F1 crosses of CC-RIX  
 50 and has been described in detail (Schoenrock *et al.* 2018). Nine  
 51 genetically distinct reciprocal CC-RIX were bred from 18 non-  
 52 overlapping CC strains such that samples from CC1♀ × CC2♂  
 53 and CC2♀ × CC1♂ are each represented (Figure 4a). Strain-pair  
 54 selection aimed to maximize several criteria, namely the num-  
 55 ber of known brain-imprinted loci, as defined from Crowley  
 56 *et al.* (2015) and Williamson *et al.* (2013) that are heterozygous  
 57 between haplotypes that are identical by descent with NOD and  
 58 C57BL/6J (Oreper *et al.* 2018).

59 Females from the 18 CC strains were exposed to one of four  
 60 experimental diets (vitamin D deficient, protein deficient, methyl

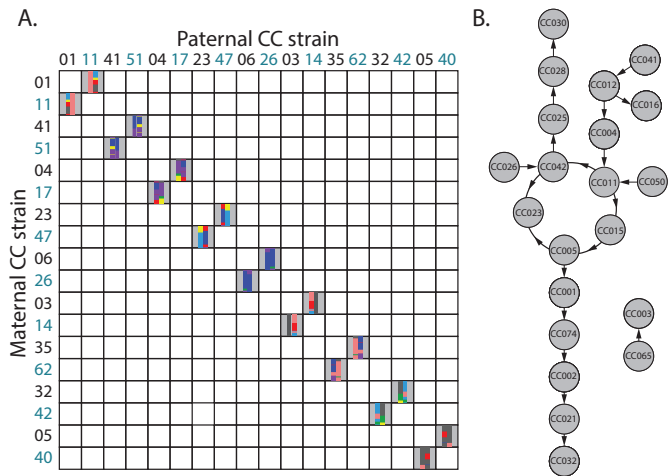

**Figure 4** Breeding schemes for two populations of CC-RIX mice that contributed data to this study. A) SP1 was developed to study POE, hence the reciprocal RIX design. Schematics of the X chromosome from each founder are shown to illustrate the paired comparisons. B) SP2 provided more diverse pairings of CC strains, without considering reciprocity. CC strains were paired in a quasi-loop design to generate dozens of RIX crosses with maximum diversity, of which this figure only shows the pertinent subset with RNA-seq data. Arrows point from the dam to the sire used for the CC-RIX.

61 donor enriched, or standard control chow; Dyets Inc., Bethle-  
 62 hem, PA) during the perinatal period from 5 weeks prior to  
 63 mating until their pups were weaned 3 weeks after birth. Whole  
 64 brain tissue was collected from 188 female CC-RIX mice at 60  
 65 days of age ( $65.1 \pm 4.8$  days (mean and st dev)). Mice used for  
 66 gene expression studies were behaviorally naïve. Tissue was  
 67 collected in 26 batches with a minimum of 2 RIX/diet combi-  
 68 nations in a batch. Mice were euthanized and whole brain was  
 69 immediately extracted. A sagittal cut was made to hemisection  
 70 the left and right hemisphere and tissue was immediately flash  
 71 frozen in liquid nitrogen and stored at  $-80^\circ$  until pulverization.  
 72 Right brain hemispheres of all samples were pulverized using a  
 73 BioPulverizer unit (BioSpec Products, Bartlesville, OK).

74 **SP2:** In the second population, 21 CC strains, 10 of which  
 75 overlap with the strains in SP1, produced 19 non-reciprocal RIX.  
 76 These mice were part of a study to elucidate the genetic basis  
 77 of antipsychotic-induced adverse drug reactions and has been  
 78 previously described (Giusti-Rodríguez *et al.* 2020). The larger  
 79 study comprised 840 mice, representing 62 CC strains and 73 RIX  
 80 lines. The design of the RIX crosses formed a quasi-loop such  
 81 that each maternal line was also the paternal line for another  
 82 cross (see 4b). Only 85 female samples with RNA-seq data were  
 83 relevant to our analysis so the number of replicates from SP2  
 84 is smaller than from SP1 with a median of four samples per  
 85 CC-RIX (range: 2-7).

86 Starting at 8-weeks of age, the mice were subjected to a 30  
 87 day treatment protocol where half were implanted with slow-  
 88 release haloperidol (antipsychotic drug) pellets (3.0 mg/kg/day)  
 89 and the other half received placebo. Treated and untreated mice  
 90 were matched between sexes, RIX cross, cage, and batch. After  
 91 30 days of exposure to drug or vehicle at 12 weeks of age, mice  
 92 were sacrificed by cervical dislocation without anesthesia to  
 93 avoid effects on gene expression. Complete description of this  
 94 experiment is provided in an independent manuscript (FPMV,  
 95 unpublished).

## 1 RNA-seq preparation

2 SP1: For 188 mice, total RNA was extracted from ~25 mg of  
3 powdered right brain hemisphere tissue using Maxwell 16 Tis-  
4 sue LEV Total RNA Purification Kit (AS1220, Promega, Madison,  
5 WI). UNC HTSF core performed RNA concentration and quality  
6 check using fluorometry (Qubit 2.0 Fluorometer, Life Technolo-  
7 gies Corp., Carlsbad, CA) and a microfluidics platform (Bioana-  
8 lyzer, Agilent Technologies, Santa Clara, CA). RNA-sequencing  
9 was performed in three sequencing batches spread out over the  
10 course of the two-year collection of brain tissue once 96 samples  
11 from F1 CC-RIX offspring were obtained. There were a median  
12 of 20 samples per CC-RIX (range: 12-32), with 3-4 samples per  
13 diet and reciprocal direction.

14 RNA was prepped with the Illumina TruSeq Stranded mRNA  
15 protocol for 100 base pair, stranded, single-end reads at the UNC  
16 sequencing core. An initial round of RNA-seq was conducted  
17 in December 2014 and June 2015 on HiSeq 2500 machines, and  
18 quality control (QC) was conducted on the first few batches  
19 of RNA-seq output with fastqc/0.11.8. Reads with low “Per  
20 base sequence quality” and “Per sequence quality scores” were  
21 prioritized for a second library prep. This first round of RNA-  
22 seq was followed up with more sequencing in June 2019 on a  
23 HiSeq 4000 machine to boost average read depth for each sample.  
24 The final data for each sample were subjected to the same QC  
25 criteria and combined, for an average of 24.6 million (M) reads  
26 per sample (median 17.9 M, range 10.6-109 M). 7 samples were  
27 removed due to missing X chromosomes or low read count.

28 SP2: Detailed methods for RNA-seq sample preparation and  
29 processing are described in an independent manuscript (FPMV,  
30 unpublished). Briefly, RNA was extracted from striatum using  
31 the Total RNA Purification 96-Well Kit (Norgen Biotek, Thorold,  
32 ON, Canada) and prepared with the Illumina (San Diego, CA)  
33 TruSeq Stranded mRNA Library Preparation Kit v2 with polyA  
34 selection using 1 µg total RNA as input. Equal amounts of all  
35 barcoded samples were pooled, to account for lane and machine  
36 effects. Each of the three pools was sequenced on eight lanes of  
37 the Illumina HiSeq 2000 for 100 base pair, stranded, single-end  
38 reads.

39 Quality control filtered out lanes with significant issues in  
40 terms of duplication level, fraction of mapped reads (using  
41 TopHat2) and, after summarizing reads at a gene level, frac-  
42 tion of mapped reads among the reads that were mapped to  
43 an exon. We only considered samples that passed 3 cutoffs: fil-  
44 tering by duplication (at most 40% duplication), percentage of  
45 mapped reads (at most 25% reads not mapping) and percentage  
46 of mapped reads being mapped to a gene (at most 35% not being  
47 mapped to a gene). QC procedures also resulted in corrections or  
48 discarded samples due to mismatches in labeling for strain and  
49 sex. Principle component analysis identified an outlier that was  
50 also removed. Another sample was removed due to a missing X  
51 chromosome.

52 Demographic details about the 266 CC-RIX samples across  
53 study populations are compiled in File S1.

## 54 Genotyping in CC-RIX and haplotype reconstruction

55 To ensure accurate phasing of variants, each sample in SP1 was  
56 genotyped on the MiniMUGA platform (Sigmon *et al.* 2020). Mini-  
57 MUGA is an array-based genetic QC platform with over 11,000  
58 probes designed to perform robust discrimination between most  
59 classical and wild-derived laboratory mouse strains. Three X0  
60 females from SP1 that were removed from subsequent analy-  
61 sis were confirmed using the MiniMUGA platform, serving as

a useful negative control for our ASE quantification methods. 62  
Haplotypes corresponding to each CC founder strain were recon- 63  
structed using R/qt2 v0.20 (Broman *et al.* 2019). Genotype- and 64  
allele-probabilities for SP2 were inferred from previous genotyp- 65  
ing conducted on CC strains and two to four additional animals 66  
per strain known to be their most recent common ancestors us- 67  
ing the MegaMUGA platform. MegaMUGA comprises up to 68  
77,800 single nucleotide polymorphism (SNP) markers that were 69  
optimized for detecting heterozygous regions and discriminat- 70  
ing between haplotypes in homozygous regions, with a special 71  
emphasis for markers that are informative in the CC (Morgan 72  
*et al.* 2016). Genotyping for MiniMUGA and MegaMUGA was 73  
performed at Neogen (Lincoln, NE). Cross-referencing RIX hap- 74  
lotype regions with known CC and CC founder variants for con- 75  
sistency was particularly important at heterozygous loci where 76  
the correct parental inheritance would be critical for determining 77  
ASE. 78

79 We defined the *Xce* in the data based on previously published 79  
intervals because all 8 CC founder strains are represented in ev- 80  
ery sample, instead of each mouse representing one single strain. 81  
In iterative stages we defined *Xce*, first, based on the interval 82  
described in Chadwick *et al.* (2006) from 101.6-103.6 Mb, and 83  
then, refined to the minimum interval described in Calaway *et al.* 84  
(2013) roughly from 102.75-102.92 Mb because the narrower in- 85  
terval was still consistent with both our results from the broader 86  
interval and previously observed XCI skews between strains. All 87  
base pair positions throughout the manuscript are derived from 88  
the Genome Reference Consortium Mouse Build 38 (GRCm38). 89

## Measuring allele-specific expression (ASE) in F1 females 90

91 To detect allele- and chromosome-specific expression, we have 91  
developed a novel approach using direct k-mer matching to capi- 92  
talize on known variants in the sequenced CC and founder mice. 93  
Key to this method is set of virtual 25-base genotyping probe 94  
sequences created from the forward and reverse complement 95  
sequences centered about both reference and alternate variants. 96  
The reference sequence was provided by the GRCm38 reference 97  
mouse genome, based on C57BL/6J, and alternate alleles were 98  
collected from sequence data of the other 7 CC founder strains 99  
obtained from the Sanger Institute’s Mouse Genomes Project 100  
(Keane *et al.* 2011). 101

102 The variant set was filtered to remove unusually high and 102  
low probe-sequence counts occurring in any of the sequenced 103  
samples. An initial set of approximately 866,000 genome-wide 104  
variants were verified across CC and founder strains and be- 105  
came the anchors for matched pairs of k-mers with either the 106  
reference or variant allele in the center base. Roughly 590,000 of 107  
these k-mers are present in sequences with the highest transcript 108  
support level (TSL1), and of those about 414,000 are unique. 109  
We filtered k-mers to exclude those that (1) contain multiple 110  
variants, and match to (2) duplicated sequences, (3) patterns 111  
that are missing from multiple founder strains, (4) loci close to 112  
exon start sites, and critically, (5) multiple genomic locations 113  
in any CC strain. Taking these criteria into account, between 114  
40-60% of the remaining variants were usable per chromosome. 115  
The remaining 7,957 k-mers on the X chromosome comprise a 116  
set of paired 25-mers designed to uniquely identify if a sample 117  
contains the reference or alternate allele (File S2). We used the 118  
tool msbwt v0.3.0 (run on python/2.7.11) to transform our RIX 119  
RNA-seq reads into multi-string Burrows-Wheeler Transform 120  
(BWT) formatted files to perform efficient, exact k-mer searches 121  
to count instances of each k-mer in the RNA-seq reads, thereby 122

1 quantifying gene expression corresponding to each CC parent  
2 in an allele-specific fashion (Holt and McMillan 2014).

### 3 **Statistical modeling of X chromosome inactivation**

4 We designed a Bayesian hierarchical model to estimate X inacti-  
5 vation proportion at the level of the gene, individual, and RIX,  
6 based on the RNA data above. The model also, as a byproduct  
7 of its use of beta distributions and their connection to Pólya urns,  
8 estimates the number of brain precursor cells in the epiblast at  
9 the point of X inactivation choice, at around E5.5 (Rastan 1982;  
10 Lenarcic et al. 2018). This section describes first the model for  
11 estimating the XCI proportion associated with a given RIX, and  
12 then the estimation of the number of brain precursor cells (here-  
13 after, the day 5 brain precursor count) based both on a given RIX  
14 and on all RIXs combined. The main components of the model  
15 are summarized in Figure 5, with more detail in Figure S1.

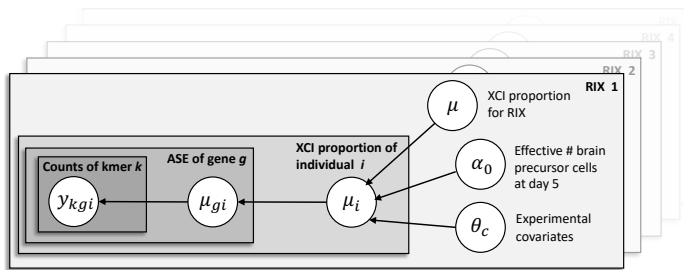

**Figure 5** Directed acyclic graph (DAG) showing the main parameters of the hierarchical model for XCI proportion at the gene-, individual mouse-, and RIX level. The  $y_{kgi}$  node is observed; all other nodes are parameters to be estimated. This model is applied to each RIX separately. Estimates for the number of day 5 brain precursor cells ( $\alpha_0$ ), across RIXs are then combined through a post-processing step.

16 **Model for RIX-specific XCI proportion.** The average XCI propor-  
17 tion inherent to a RIX is reflected by the XCI proportions of mice  
18 from that RIX. These mouse-level XCI proportions are in turn  
19 reflected by ASE at X chromosome genes. Our model estimates  
20 mouse-level XCI proportions for genes by counting k-mers from  
21 the allele of one parent vs that of the other and treating these as  
22 outputs from a binomial distribution controlled by overall XCI  
23 proportions at the gene-, mouse and RIX level.

Consider a given RIX of CC strains  $u$  and  $v$ , where strain  $u$  is expected to have a weaker  $Xce$  allele or, in the case where both are of the same strength, the maternal strain. For counts associated with  $Xist$ , which is expressed from the Xi and should therefore have the opposite XCI proportion, the assignment of  $u$  and  $v$  were reversed. For mouse  $i = 1, \dots, n$ , let  $N_{kgi}$  be the total number of counts for k-mer  $k$  of gene  $g$  and let  $y_{kgi}$  be the number of these counts specifically from strain  $u$ . Then,  $y_{kgi}$  is distributed

$$y_{kgi} \sim \text{Bin}(N_{kgi}, \mu_{gi}),$$

where  $\mu_{gi}$  is the expected proportion expressed from strain  $u$  vs strain  $v$  for gene  $g$  in mouse  $i$ . Different genes  $g = 1, 2, \dots$  can have different proportions  $\mu_{1i}, \mu_{2i}, \dots$ , but we require these to be centered around a common individual-level proportion  $\mu_i$  as

$$\mu_{gi} \sim \text{Beta}(\text{mean} = \mu_i, \text{precision} = \alpha),$$

where this corresponds to the conventional parameterization,  $\text{Beta}(\mu_i \alpha, (1 - \mu_i) \alpha)$ . The individual-level proportion  $\mu_i$  is modeled as

$$\mu_i \sim \text{Beta}(\text{mean} = \mu_{c[i]}, \text{precision} = \alpha_0). \quad (1)$$

where  $c[i]$  denotes the combination of experimental factors  $c$  that are relevant to mouse  $i$ ,  $\mu_c$  is the XCI proportion predicted for that combination, and  $\alpha_0$  models the day 5 brain precursor count (described later). The proportion  $\mu_c$  is modeled through a logit link as the outcome of a linear predictor,

$$\eta_c = \log\left(\frac{\mu_c}{1 - \mu_c}\right) \quad (\text{logit link})$$

$$\eta_c = \beta_0 + \theta_c.$$

where intercept  $\beta_0$  models an overall value for the RIX, and  $\theta_c$  incorporates the effects of experimental covariates.

The set of experimental covariates in  $\theta_c$  was different for SP1 and SP2. For SP1, these were perinatal diet (diet), POE (recip), and their interaction,

$$\theta_c = \text{diet}_c \beta_D + \text{recip}_c \beta_R + \text{diet}_c \text{recip}_c \beta_{DR}, \quad (\text{SP1})$$

where  $\text{diet}_c$  is a categorical predictor indicating the perinatal diet to which mice in condition  $c$  was exposed,  $\beta_D$  is a  $n_{\text{diet}}$ -vector of diet effects constrained to sum to zero,  $\text{recip}_c$  indicates the reciprocal direction ( $-\frac{1}{2}$  if the dam was  $u$ ,  $+\frac{1}{2}$  if the dam was  $v$ ),  $\beta_R$  is the POE, and  $\beta_{DR}$  is a  $n_{\text{diet}}$ -vector of treatment-by-POE, also constrained to sum to zero. Across the RIXs in SP1,  $n_{\text{diet}}$  ranged from 2-4, corresponding to a maximum of 4, 6, or 8 conditions per RIX. For RIXs where any condition level  $c$  contained only one sample, we set  $\theta_c = 0$ .

For SP2, which did not include reciprocal crosses, we initially considered using

$$\theta_c = \text{trt}_c \beta_T, \quad (\text{SP2})$$

where  $\text{trt}_c$  indicates the drug treatment assignment ( $+\frac{1}{2}$  for haloperidol,  $-\frac{1}{2}$  for placebo) of condition level  $c$ . Treatment assignment was missing for 9 mice, and in these cases we used model-based imputation,  $\text{trt}_c = \gamma_c - \frac{1}{2}$  with  $\gamma_c \sim \text{Bin}(1, 0.5)$ . The treatment effect, however, was observed to be zero (see File S3), which serves as a negative control for the model given the timing of the drug dose at 8 weeks after birth, well after XCI is established. Because of the zero effect, the lack of a strong biological rationale for its inclusion, and the relative instability of its estimation for some RIX, the final model for SP2 was  $\theta_c = 0$ , ie, with treatment effect excluded.

Our primary target quantity for each RIX, regardless of its population, was the overall XCI proportion,  $\mu$ , given by the inverse logit of  $\beta_0$ , i.e.,

$$\mu = \frac{e^{\beta_0}}{(1 + e^{\beta_0})}. \quad (\text{RIX-specific XCI proportion})$$

We additionally report XCI proportions for each mouse,  $\mu_i$  for  $i = 1, \dots, n$ .

Prior distributions for parameters were specified as follows. For parameters modeling RIX-wide XCI, we set  $\beta_0 \sim \text{Logistic}(0, 1)$  such that  $\mu \sim \text{Unif}(0, 1)$ , i.e., a flat prior on overall XCI proportion. The prior set on  $\alpha_0 \sim \text{Uniform}(0, 1000)$  reflected a reasonable number of cells in the whole embryo at around E5-6 (Snow 1977). Other parameters were modeled with weakly informative priors:  $\beta_R, \beta_T \sim \text{N}(0, 10^4)$ ;  $\beta_{TR}, \beta_{DR} \sim \text{N}_{\text{stz}}(\mathbf{0}, 10^4 \times \mathbf{I})$ , where  $\text{N}_{\text{stz}}()$  is the multivariate normal distribution constrained so that its variates sum to zero [after Crowley et al. (2014), Appendix A]; and  $\alpha \sim \text{Ga}(0.01, 0.01)$ .

Posterior distributions for parameters were obtained using Markov chain Monte Carlo (MCMC). MCMC was performed over two separate chains each run with  $5 \times 10^4$  (SP1) or  $10^5$  (SP2)

1 iterations, discarding the initial 10% of the iterations as burn-  
2 in and thinning every 5, thus providing  $1.8 \times 10^4$  or  $3.6 \times 10^4$   
3 posterior samples in total. Estimates are reported as posterior  
4 means (modes and medians are supplied in Tables S1-2) with  
5 95% highest posterior density (HPD) intervals. All models were  
6 written and implemented in JAGS 4.3.0 (Plummer 2003) and R  
7 version 3.5.2 (R Core Team 2017). Code to run the statistical  
8 model is available at [https://github.com/kathiesun/XCI\\_analysis](https://github.com/kathiesun/XCI_analysis).

### Pólya urn-based estimation of the day 5 brain precursor count.

In our model for X inactivation, the individual-specific XCI proportion  $\mu_i$  is modeled as a beta distribution with precision  $\alpha_0$  (Equation 1). This use of the beta distribution can be directly related to an idealized model of cell proliferation based on a Pólya urn (Lenarcic et al. 2018) (Figure S1). The Pólya urn is a hypothetical random process that begins with an urn containing  $a$  red balls and  $b$  blue balls. A ball is drawn at random and replaced by two balls of the same color. This is repeated an infinite number of times, after which the proportion of red balls  $p_{\text{red}}$  in the urn will be distributed as

$$p_{\text{red}} \sim \text{Beta}(\text{mean} = a/(a+b), \text{precision} = a+b),$$

9 where the precision  $a+b$  is the total number of balls at the point  
10 the process began. To the extent that proliferation of embryonic  
11 cells in alternate XCI states is analogous to the proliferation of  
12 alternate color balls in the Pólya urn, our precision parameter  $\alpha_0$   
13 models the (effective) number of brain-relevant cells at the point  
14 of the E5.5 XCI decision.

We estimated 1) an  $\alpha_0$  for each RIX, and 2) a global  $\alpha_0$ , based on all RIX data. Posterior distributions of  $\alpha_0$  for each RIX is were obtained using MCMC as described above. These were similar to each other but individually somewhat vague (see Results). To obtain a more precise estimate, we assumed the  $\alpha_0$  was the same across RIXs and calculated a posterior given all RIX data as the normalized product of the individual posteriors,

$$p(\alpha_0 | \mathcal{D}_1, \dots, \mathcal{D}_R) \propto \prod_{r=1}^R p(\alpha_{0,r} | \mathcal{D}_r),$$

15 where  $p(\alpha_{0,r} | \mathcal{D}_r)$  denotes the posterior for RIX  $r = 1, \dots, R$   
16 give RIX data  $\mathcal{D}_r$ , and the above relation holding only because the priors on  $\alpha_0$  are identical and uniform such that  
17  $p(\alpha_0) \propto \prod_{r=1}^R p(\alpha_{0,r})$ . In practice, this involved parametrically  
18 approximating each RIX posterior,  $p(\alpha_{0,r} | \mathcal{D}_r)$ , as gamma distribution with shape  $\hat{A}_r$  and rate  $\hat{B}_r$  using the `fitdistr()` function  
19 from the R package MASS v7.3-51.4 (Venables and Ripley 2002),  
20 and then calculating their renormalized product, which is equivalent to a gamma distribution with shape  $\sum_{i=1}^R \hat{A}_r - (R-1)$  and  
21 rate  $\sum_{i=1}^R \hat{B}_r$ .

22 Point and interval estimates from the aggregate posterior approach above were comparable to those from traditional random-effects meta-analysis on the per-RIX estimates, the latter conducted with the R package `meta` v4.14-0 (Balduzzi et al. 2019) using both inverse variance and DerSimonian-Laird estimators (DerSimonian and Laird 1986).

### Whole genome sequences of CC strains

32 Over the last few years, high-coverage sequences of the CC strains have been made available to the research community. These whole genome sequences (WGS) improved upon the resolution of recombination breakpoints and haplotype assignment in 75 CC strains by sequencing paired-end short reads (150 bp)

at 30x coverage for a single male per strain (Srivastava et al. 2017; Shorter et al. 2019). Deeper sequencing led to improved haplotype reconstruction in samples bred from CC strains, and allowed for identification of unique mutations private to a particular strain. We incorporated additional WGS of the CC founder strains from other previously published sources (Keane et al. 2011) and from the GRCm38 mouse reference genome.

The WGS described above for 75 CC strains, along with 24 replicates of C57BL/6J mice and one replicate each of the other seven CC founders, have been made publicly available in BWT-formatted DNA-seq reads <http://csbio.unc.edu/CEGSseq/index.py>. These multi string BWTs were built using the msBWT python tool (Holt and McMillan 2014) from all lanes and paired ends of the Illumina read sets for these genome sequences. Resources making use of the the BWT dataset for efficient k-mer searches have been previously described (Srivastava et al. 2017).

### Haplotype analyses based on WGS

The resulting WGS from the CC strains were used to assemble 8 intervals totalling 8,215 bp across the Calaway et al. (2013) minimum *Xce* locus in each one of the 8 CC founders. The following CC strains represented the corresponding founder as follows: reference genome for C57BL/6J; CC055 as representative of the NOD haplotype; CC020 for A/J; CC024 for 129S1/SvImJ; CC051 for WSB/Eij; CC032 for CAST/Eij; CC003 for PWK/PhJ; and CC002 for NZO. We first identified intervals between 0.4 – 3 Kb in length, composed of contiguous 45-mers that are present only once in the reference genome. We used the most proximal of these 45-mers as a seed and assembled the sequence in the CC strains using the consensus of the read pileups. All bases used in the consensus were supported by at least two independent reads and, within each strain, lacked any evidence of SNPs or copy number differences. Once assembled, the sequences were aligned using the EMBL-EBI tool, Clustal Omega (Madeira et al. 2019), and alignments were optimized by manual inspection to reduce the number of variants. The location, length, and CC strains used for the assembly are shown in Table S3.

### Phylogenetic analysis of CC founder strains

The 8 assembled intervals spanning the *Xce* region were used to estimate the phylogenetic relationship based on X chromosome sequence similarity among the 8 CC founders using BEAST 2.6.3, which performs Bayesian evolutionary analysis by sampling trees (Bouckaert et al. 2019). The tree model was based on a coalescent prior for a constant population and was simplified with linked site, clock, and tree parameters among the intervals. We assumed a strict clock and the HKY substitution model (Hasegawa et al. 1985). We generated  $10^7$  MCMC samples from the posterior of coalescent trees, thinning every  $10^3$  samples, over the course of three separate runs with different starting seeds for a total of  $3 \times 10^4$  recorded posterior samples. We visualized the resulting tree set using DensiTree.v2.2.7, which shows different topographies with varying level of support.

### Quantifying copy number variations

The set of 106 WGS with BWT-formatted data described above was also previously used to develop an occurrence-count matrix of every sequential, non-overlapping 45-mer from the standard mouse reference (GRCm38). We used this count matrix to query 45-mers across CC strains containing different functional alleles in the putative *Xce* interval defined in Calaway et al. (2013). By comparing and quantifying differential k-mer counts between

1 strains, we generated discrete evidence of CNVs in regions along  
2 the X chromosome. Samples were classified into eight groups  
3 corresponding to the CC founder strains at the *Xce* interval,  
4 roughly between 102.65-102.95 Mb when translated to GRCm38  
5 coordinate space. The 24 C57BL/6J replicates comprised the  
6 baseline "reference" group and the remaining CC-derived sam-  
7 ples that were homozygous for C57BL/6J across the *Xce* interval  
8 were separated into another group to provide a negative control.

9 Strain-wide copy numbers for each k-mer were first normal-  
10 ized per sample and then averaged across samples in each group.  
11 Segmental duplications (SD) and inversions (I) were defined as  
12 regions where the mean difference,  $\Delta$ , between 45-mer counts in  
13 the comparison strain versus the inbred C57BL/6J mean were  
14 different than 0 after k-means clustering of  $\Delta$  centered at 0,  
15  $> 0$ , and  $< 0$ . K-mers that have an average of one copy in  
16 the reference group and zero copies in the comparison group  
17 were deemed to contain nucleotide polymorphisms in the non-  
18 reference strain. The relevant 45-mers spanning the *Xce* are  
19 compiled in File S4, along with the X chromosome positions,  
20 the number of copies present in the reference genome, and any  
21 SD or I assignments. Alignment boundaries for each SD were  
22 determined and visualized using Gepard v1.40 with word size  
23 of 45 (Krumstiek *et al.* 2007).

## 24 Data availability

25 The processed data and code to support the results reported here  
26 are available at Figshare [link]. These data include: R scripts  
27 to re-generate figures in this manuscript and intermediate data  
28 files; full demographic data for SP1 and SP2; curated lists of  
29 25-mers used to detect reference and variant alleles in RNA-  
30 seq data from the X chromosome along with code to generate  
31 this list; k-mer counts of the curated 25-mers for both popula-  
32 tions; k-mer counts of 45-mers from DNA-seq using CC and  
33 CC founder strains; haplotype probabilities based on genotyp-  
34 ing data for SP1 and based on MRCA genotypes for SP2; full  
35 MCMC sampling outputs for the statistical model. The pro-  
36 cessed incident count matrices of contiguous 45-mers for the  
37 CC strains noted above, and BWT-formatted files of all RNA-  
38 seq data are available publicly at [http://csbio.unc.edu/CEGSseq/  
39 index.py](http://csbio.unc.edu/CEGSseq/index.py). Genotyping data for the CC MRCA are available  
40 at <http://csbio.unc.edu/CCstatus/index.py?run=FounderProbs> and  
41 genotyping data for SP1 have been deposited in a UNC Data-  
42 verse repository (<https://dataverse.unc.edu/dataverse/MiniMUGA>)  
43 under DOI number 10.15139/S3/UYURKF. All R scripts to run  
44 the statistical model, and process and generate datasets are avail-  
45 able at [https://github.com/kathiesun/XCI\\_analysis](https://github.com/kathiesun/XCI_analysis).

## 46 Results

### 47 XCI ratio estimated for each mouse and RIX from RNA-seq 48 allele-specific expression

49 The CC-RIX females comprising this study were genetically het-  
50 erogeneous mosaics of the 8 CC founder strains with one copy of  
51 each chromosome inherited in its entirety from each CC parent.  
52 In order to quantify ASE, we relied on efficient multi-string BWT  
53 searching of k-mers to identify reference and alternate alleles in  
54 the RNA-seq reads. This is akin to a microarray-based quantifi-  
55 cation strategy where each k-mer represents a probe designed  
56 based on prior knowledge, allowing us to precisely target known  
57 SNPs to measure ASE.

58 Counts of k-mers containing reference and alternate alleles  
59 of variants were attributed to a particular CC parent according  
60 to the haplotype reconstruction derived from genotyping data.

The relative frequency of summed reads across a gene originat-  
ing from one of the CC parents, e.g. CC001 in a CC001/CC011  
RIX, was modeled analogously to the frequency of heads when  
flipping a potentially biased coin, as a binomial count that de-  
pends on an underlying long-run proportion that may deviate  
from 0.5. This proportion was estimated for each gene; the pro-  
portions across genes were used to estimate an underlying XCI  
proportion for each mouse; and the XCI proportions across mice  
were used to estimate a proportion specific to the RIX. These  
estimations were performed simultaneously using a Bayesian  
hierarchical model, which also 1) incorporated, and thereby cor-  
rected for, potential effects of experimental or breeding-related  
factors, and 2) connects the variability of mouse-specific XCI  
proportions about their RIX-wide mean to the subset of epiblast  
cells at the point of the initial XCI decision contributing to the  
assayed tissue, in this case the brain.

### 51 XCI is relatively consistent across genes within an individual

52 Across an individual mouse, gene-level estimates of XCI propor-  
53 tion are stable, suggesting that our quantification methodology  
54 is reliable. Figure 6 shows XCI proportion estimates for a mouse  
55 each from three CC-RIXs (all 266 samples are shown in File S5).  
56 Our Bayesian model estimates posterior distributions for XCI  
57 proportions at the gene and RIX level; we report both the means  
58 of those distribution and their 95% highest posterior density  
59 (HPD) intervals. Gaps in the X chromosome position reflect  
60 the patchwork heterozygosity and homozygosity of the CC-RIX  
61 samples. In this example, the HPD intervals are fairly narrow  
62 around the means, indicating the precision of these estimates,  
63 and for two of the mice, the XCI proportion is far from 0.5,  
64 indicating strong XCI skew (File S5).

65 These three example mice demonstrate the consistency of  
66 estimates for each sample at genes across the X chromosome,  
67 supporting our estimates of even fairly extreme XCI skews such  
68 as those shown in the Figure 6b-c. At the mouse level, this con-  
69 sistency is representative of all of the samples in the experiment  
70 overall.

### 71 Pattern of XCI skew in RIXs with known Xce allele is consistent 72 with previous studies

73 Our results for XCI skew were largely consistent with previously  
74 published research, given our knowledge about the underlying  
75 haplotype structure of the CC strains and the known *Xce* sub-  
76 types corresponding to major *Mus musculus* strains (Figure 3).  
77 Estimates of XCI proportions for each sample and each CC-RIX  
78 are compiled in Table S1 and File S1.

79 Figure 7 shows the XCI proportion at the individual- and RIX-  
80 level for every cross in the study, divided as a) crosses between  
81 strains with previously phenotyped *Xce* alleles, b) crosses be-  
82 tween strains with inferred alleles. Crosses with both CC strains  
83 sharing the same *Xce* allele had XCI ratios at roughly 50:50. The  
84 crosses demonstrate that *Xce<sup>a</sup>* is weaker than any other known  
85 allele, as only roughly 30-35% of the cells have active chromo-  
86 somes bearing *Xce<sup>a</sup>* (Figure 7a). *Xce<sup>e</sup>* and *Xce<sup>b</sup>* are approximately  
87 of equal strength, which corroborates the similar pattern seen in  
88 Calaway *et al.* (2013).

89 Unlike the narrow HPD intervals seen at the gene and indi-  
90 vidual level (Figure 6), there is greater variability across individ-  
91 uals within a RIX. Some RIX from SP2 have wide HPD intervals  
92 reflecting their smaller replicate groups overall and perhaps a  
93 smaller starting amount of cells relative to SP1 due to RNA-seq  
94 sample collection for SP2 that took tissue from the striatum as



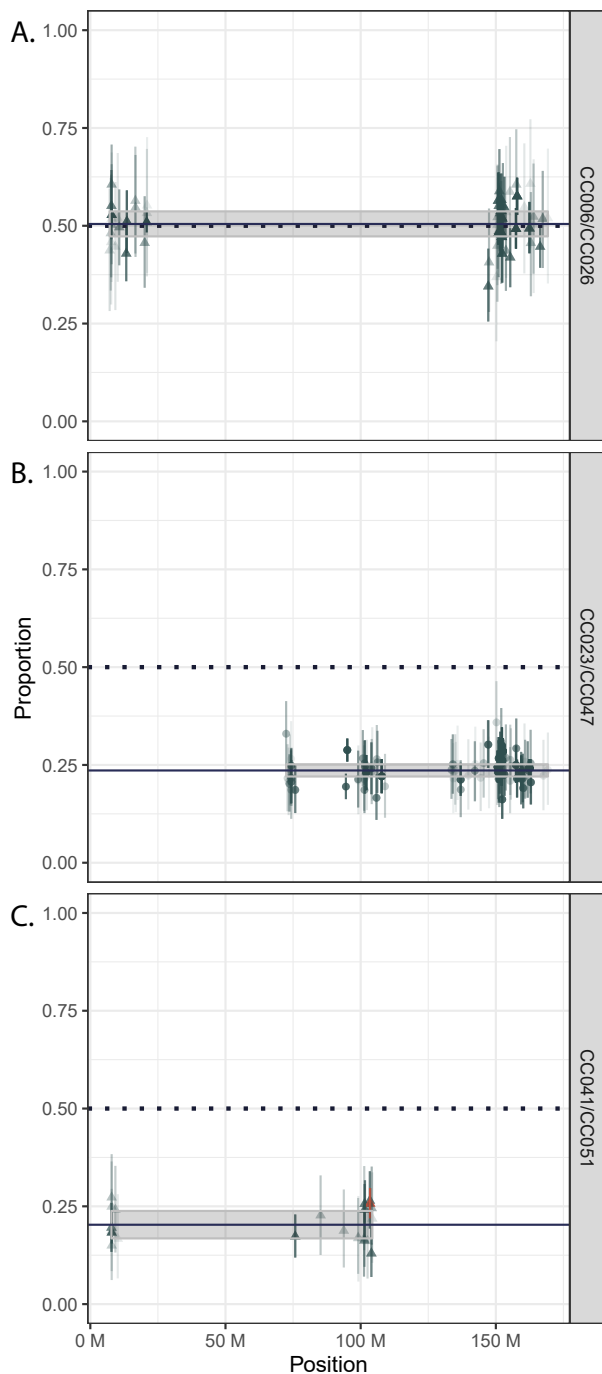

**Figure 6** Proportions of parental X chromosome representation at the gene-level (points with 95% HPD bars) for one mouse in each of three separate CC-RIX. Mouse-level estimates summarized as line across the region and shaded 95% HPD interval. Counts from the first strain cross name contribute to the numerator of the proportion. *Xce* allele status: A) CC006 and CC026 are both *Xce<sup>f</sup>*; B) CC023 (*Xce<sup>f</sup>*) has a weaker allele than CC047 (*Xce<sup>b</sup>* derived from NZO); C) CC041 (*Xce<sup>f</sup>*) has a weaker allele than CC051 (*Xce<sup>b</sup>* derived from WSB/Eij).

have HPD intervals that are less informative, e.g. CC015/CC005, CC015/CC011, and CC021/CC002 (Figure 7).

The width of the HPD intervals at the RIX level derives from the precision,  $\alpha_0$ , of the overall RIX-wide XCI proportion. Though we described some legitimate experimental artifacts that may contribute to lower precision in certain RIX crosses, there are also true underlying biological reasons for this variation among samples in a cross. Inter-individual variability among the samples in a RIX can be interpreted as different amounts of starting cells that correspond to our precision estimate,  $\alpha_0$ , as described next.

#### Estimated number of cells in pre-brain epiblast tissue range from 20 to 30

Our statistical model for sample-specific XCI proportion implies a Pólya-urn model for cell proliferation in which one of the estimated parameters,  $\alpha_0$ , relates to the number of brain precursor cells in the epiblast at the onset of random X inactivation. Our estimates of  $\alpha_0$  were strikingly concordant between the two sample populations (Figure 8 and Table S2), and so we combined them to give a single, overall value. The combined posterior distribution for  $\alpha_0$  followed a gamma distribution with shape parameter 100.36 and rate parameter 4.10. This translates to a point estimate (posterior mean) for  $\alpha_0$  of 24.48 with standard error (posterior standard deviation) of 2.44 and a 95% HPD interval of 19.93 to 29.50. Our model thus suggests that the number of initial pluripotent cells in the epiblast that eventually form brain tissue in mature mice may be around 20-30. This is a reasonable figure given the number of total cells in the epiblast ranges from around 120 on E5.5 to 660 on E6.5 (Snow 1977).

#### Unexpected XCI skewing in RIX females with the NOD *Xce* allele

As well as corroborating earlier studies, the CC strain data also characterized the XCI (and thus *Xce* subtype) for two founder strains that had not been previously evaluated. Both founder strains, NOD and NZO, had been previously assigned to *Xce<sup>b</sup>* due to sequence similarity with the reference genome.

We found a striking pattern of skewed XCI in crosses containing haplotypes derived from NOD at the *Xce* interval from 102.65-102.95 Mb. Crosses heterozygous at this locus between NOD and any other founder exhibited profoundly skewed XCI proportions, despite the expectation that skewing would behave similarly with other strains carrying *Xce<sup>b</sup>*. Our results indicate that NOD harbors a novel *Xce* allele conferring a lower tendency to remain active, weaker even than *Xce<sup>f</sup>*. Figure 6 shows examples of gene- and sample-wide estimates of XCI proportion in three different CC-RIX crosses, each with NOD contributing the *Xce* region for at least one of its inherited X chromosomes.

Chromosomes bearing the *Xce* derived from NOD were consistently more likely to be inactivated than any other *Xce* allele (Figure 7b). This consistency suggests that this observed skewing is due to underlying variation that is inherent to the NOD *Xce* haplotype and not CC strain-specific factors, leading us to establish *Xce<sup>f</sup>* from NOD as new allele in the functional series. Unexpected skews were observed in 11 out of 12 CC-RIX where one parental chromosome inherits the NOD *Xce* allele. This concordance was irrespective of different CC and founder strains carrying the *Xce<sup>f</sup>*, and transcended different *Xce* pairings, suggesting that this result is genuinely due to primary skewing.

Interestingly, chromosomes from NZO behave like they carry *Xce<sup>b</sup>* which follows our *a priori* assumptions. This narrows our

1 opposed to whole brain tissue for SP1. An additional caveat is  
 2 that haplotype reconstruction for SP2 relied upon genotyping  
 3 data from the CC resource and not the specific individual mouse,  
 4 which may have led to errors in assigning haplotypes, particu-  
 5 larly near segregation points. Therefore, some RIX from SP2

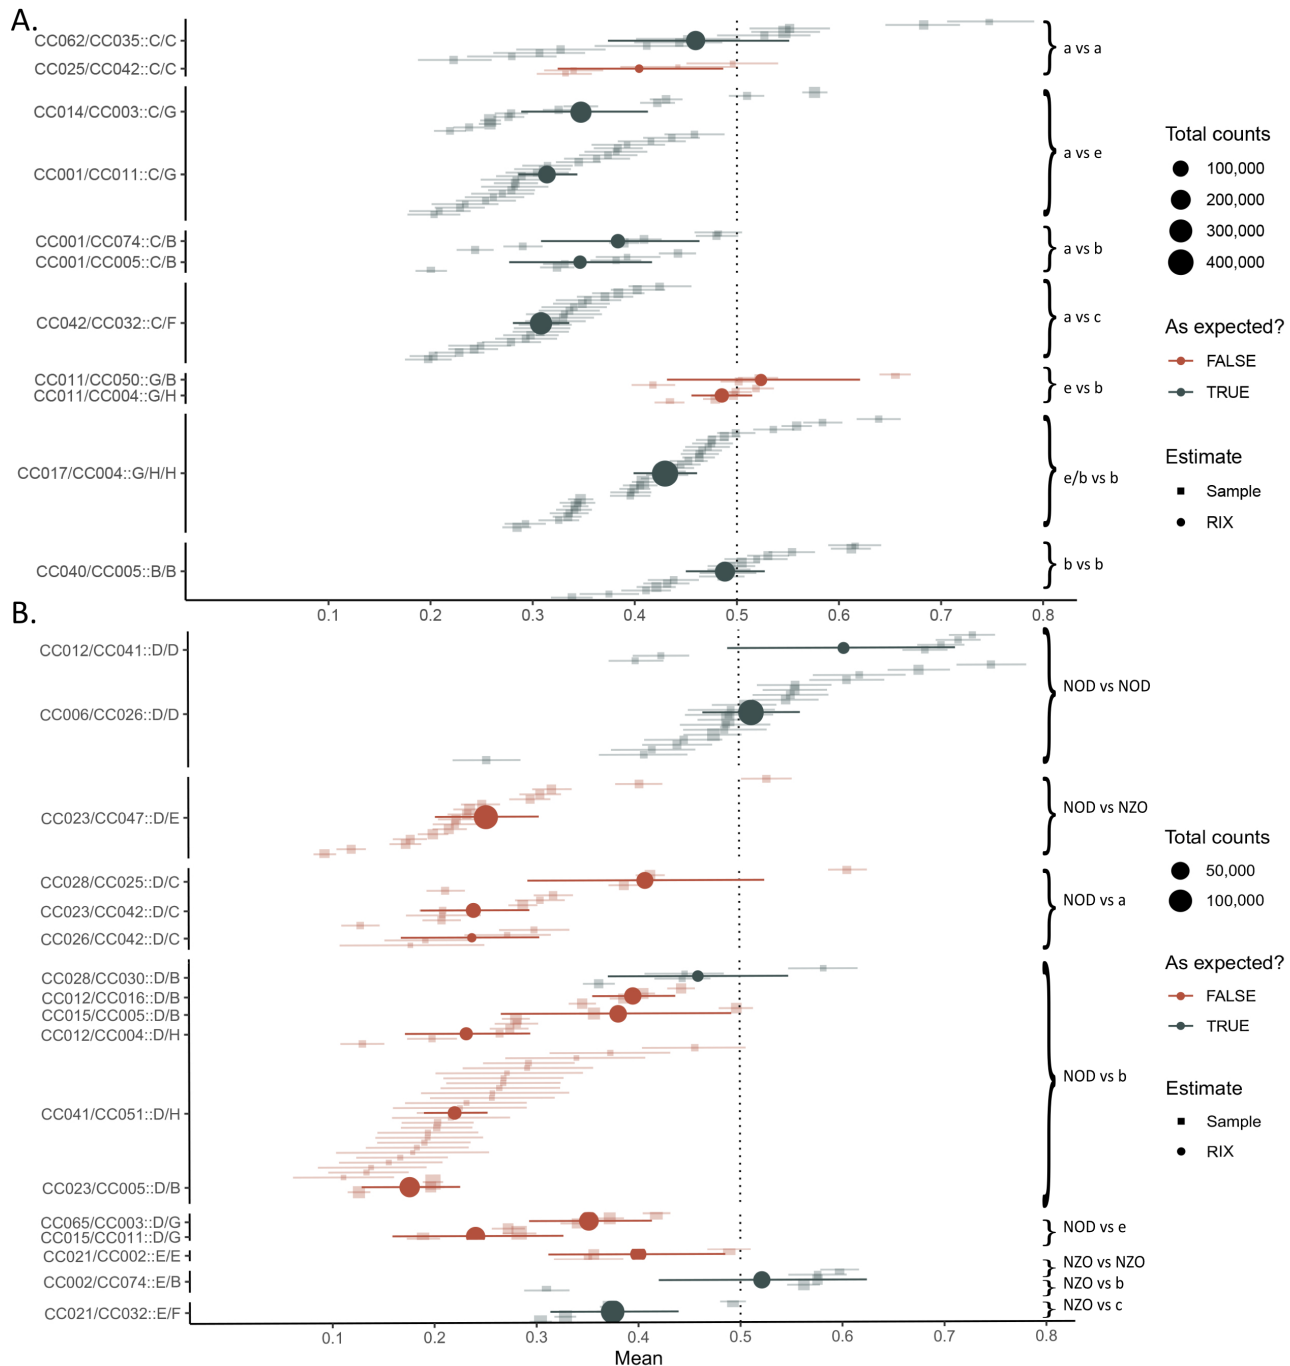

**Figure 7** XCI proportion for all 266 samples across 28 CC-RIXs. Crosses where both CC parent contain previously-observed *Xce* alleles (A), and crosses where at least one CC parent is NOD or NZO within the interval (B). The y-axis labels state the CC-RIX followed by the two founder haplotypes that overlap the *Xce* in that CC-RIX. The *Xce* comparison for each group of RIX crosses is noted on the left vertical axis. Square points show the mean estimate of XCI proportion with 95% HPD bars for individual samples. The size of the point reflects the total k-mer counts from the sample, corresponding to its total RNA-seq read count and informativeness. Each cross is summarized across the RIX with round points. Crosses in gray match our predicted estimates of XCI skewing based on known or inferred *Xce* allele whereas crosses highlighted in red do not.

1 focus of inquiry because both NZO and NOD are identical-by-  
 2 descent in this region and harbor few SNPs compared with the  
 3 mouse reference genome. As a result, we investigated whether  
 4 1) the observed XCI skewing phenomenon in NOD—and by ex-  
 5 tension, other *Xce* functional alleles—may be driven by chro-  
 6 somal rearrangements and not necessarily sequence variation;  
 7 or 2), NOD and/or NZO were improperly categorized as *Xce*<sup>b</sup>  
 8 based on haplotype similarity.

**SNP analysis in the *Xce* interval show that NOD and C57BL/6J have almost identical haplotypes**

Given the unexpected patterns of XCI skewing in RIX females that carry the NOD *Xce* haplotype in heterozygosity, we decided to use recently released WGS from 75 CC strains to determine the extent of haplotype sharing between the CC founders. To ensure that we only compare orthologous sequences we limited this analysis to genomic regions spanning the *Xce* candidate

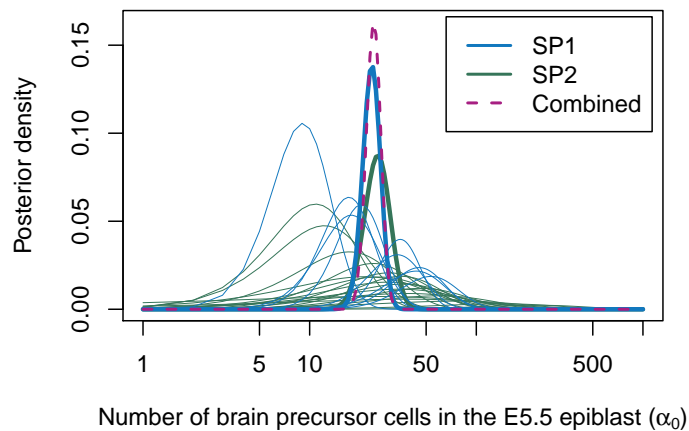

**Figure 8** Bayesian inference of parameter  $\alpha_0$ , which estimates the number of brain precursor cells in the E5.5 epiblast. Fitted posterior curves are shown for each RIX (thin lines) from SP1 (blue) and SP2 (green), with consensus posteriors for SP1 and SP2 (thick blue and green), and an overall consensus posterior (dotted magenta) centered at 24.48 (95% HPD 19.93-29.50). The horizontal axis is given on the log scale for readability. Shape, rate, mean, and variance estimates from the posterior for each line are provided in Table S2.

of one (see Figures S4-S5). Replicated experiments over decades (Johnston and Cattanach 1981; Simmler *et al.* 1993; Calaway *et al.* 2013) have demonstrated that  $Xce^a$  was the weakest known  $Xce$  allele, previous to our finding in NOD.

This strong molecular evidence establishes a distinction between the reference genome and strains with weak  $Xce$  alleles, supporting the idea that variations in copy number within the putative  $Xce$  region contributes to the functional allele. We hypothesize R1 is associated with a weak  $Xce$  allele, and that the chromosomal organization of CNVs in NOD, A/J, and 129S1/SvImJ may be described with the schematic shown in Figure 10C.

Compared with NOD, both A/J and 129S1/SvImJ have a markedly higher number of nucleotide variations relative to the reference (Figures S4-S5). Although all three strains share a similar pattern of repeats with R1, NOD has a weaker phenotype still compared with  $Xce^a$ . Both XCI skewing and genetic differences still remain between NOD and the two strains confirmed to possess  $Xce^a$ , leading us to establish NOD as its own allele in the functional series,  $Xce^f$ .

Strikingly, the CNV pattern seen in NZO contains notable departures from those in other strains. NZO appears to have a more complex series of nested repeats such that different portions of the "weak repeat," *i.e.* R1, are replicated at different frequencies (Figure 11). It carries three additional copies of SD4, two additional copies of SD3b, and one additional copy of a sequence segment distal to SD4 that we denote SD7.

We confirm that NZO has unique breakpoints between SDs that NOD and the reference sequence lack by querying matches of 45-mers at the SD boundaries. Neither the reference nor NOD contain repeats of SD7, so there is only one set of sequences flanking both sides of SD7, *i.e.* between SD4-SD7 and SD7-I5b. NZO, on the other hand, contains two distinct sets of k-mers on both the proximal and distal ends of SD7 (see Figure S9). This provides evidence that there are two copies of SD7 in NZO, one of which is a repeat flanked by sequences that form a pattern neither observed in the reference nor NOD. Although we are not able to verify the exact locations and pattern of the NZO duplications, shown as a hypothesized schematic in Figure S9B, we do see molecular evidence supporting the quantity of repeats in NZO and the presence of unique breakpoints between duplications and inversions. This suggests that NZO has a different chromosomal architecture in this region compared with other strains, though one that does not manifest in differences of XCI pattern compared to the reference strain.

## Discussion

In a previous study by our group (Calaway *et al.* 2013), we used a diverse set of inbred strains and allele-specific gene expression to characterize a new  $Xce$  phenotype and to narrow the putative  $Xce$  interval. That study identified a set of recurrent duplications within the  $Xce$  and suggested that variation in their copy numbers may in fact be the functional variation driving the allelic series. In the present study, we examined that hypothesis and quantified the skewing phenotypes of two CC founder strains with inferred  $Xce$  alleles based on sequence similarity with C57BL/6J across the  $Xce$  locus.

### Leveraging increased genetic diversity in CC-RIX identifies novel XCI patterns

Two important features of our methods are worth noting: 1) increased heterogeneity in the genetic composition of our F1

interval that have copy number one in the reference genome and C57BL/6J, and likely copy number one in each of the other CC founders. For each region, we assembled the CC founder sequence using the CC strain with the corresponding haplotype and deepest sequence coverage. After aligning each region, we used standard phylogenetic analysis to determine the relationships between the founder haplotypes (Figure 9). The results were fully consistent with the previously published haplotype sharing based on microarray genotyping (Calaway *et al.* 2013). Briefly, the eight founders are distributed in four well supported haplotypes: one represented by CAST/EiJ, the second by PWK/PhJ, a third that includes 129S1/SvImJ and A/J; and the fourth and last comprises C57BL/6J, NOD, NZO and WSB/EiJ. We conclude that the expectation that NOD should be  $Xce^b$  is supported by haplotype sharing.

### Copy number variations distinguish weaker $Xce$ alleles from stronger ones

The minimum  $Xce$  interval between 102,747,920-102,924,411 bp identified in Calaway *et al.* (2013) contain a series of recurring chromosomal rearrangements. These CNVs—segmental duplications (SD) and inversions (I)—were also verified in C57BL/6J with molecular assays by Sheedy (2012). We further corroborated the chromosomal architecture of this region in the mouse reference sequence with local nucleotide comparisons (Figure 10a) and optical mapping data (Figure S2). These rearrangements have been posited as a potential explanation for the effect of the  $Xce$  functional allele series.

Using direct searches of non-overlapping 45-mers, we discovered an additional copy of the X chromosome sequence from approximately 102,802,400-102,839,400 bp, forming a continuous, 37 kb repeat spanning SD3b, SD4, and the bridge sequence between these recurring regions that we denote SD6. As shown in Figure 10b, the pertinent duplicated region marked with a magenta band clearly spans 45-mers with a consistent increase of counts centered at one extra copy. Henceforth we refer to this novel CNV as R1. Furthermore, we demonstrate that both A/J and 129S1/SvImJ, which both carry  $Xce^a$ , share the same duplicated region, R1, as NOD with a roughly increased copy number

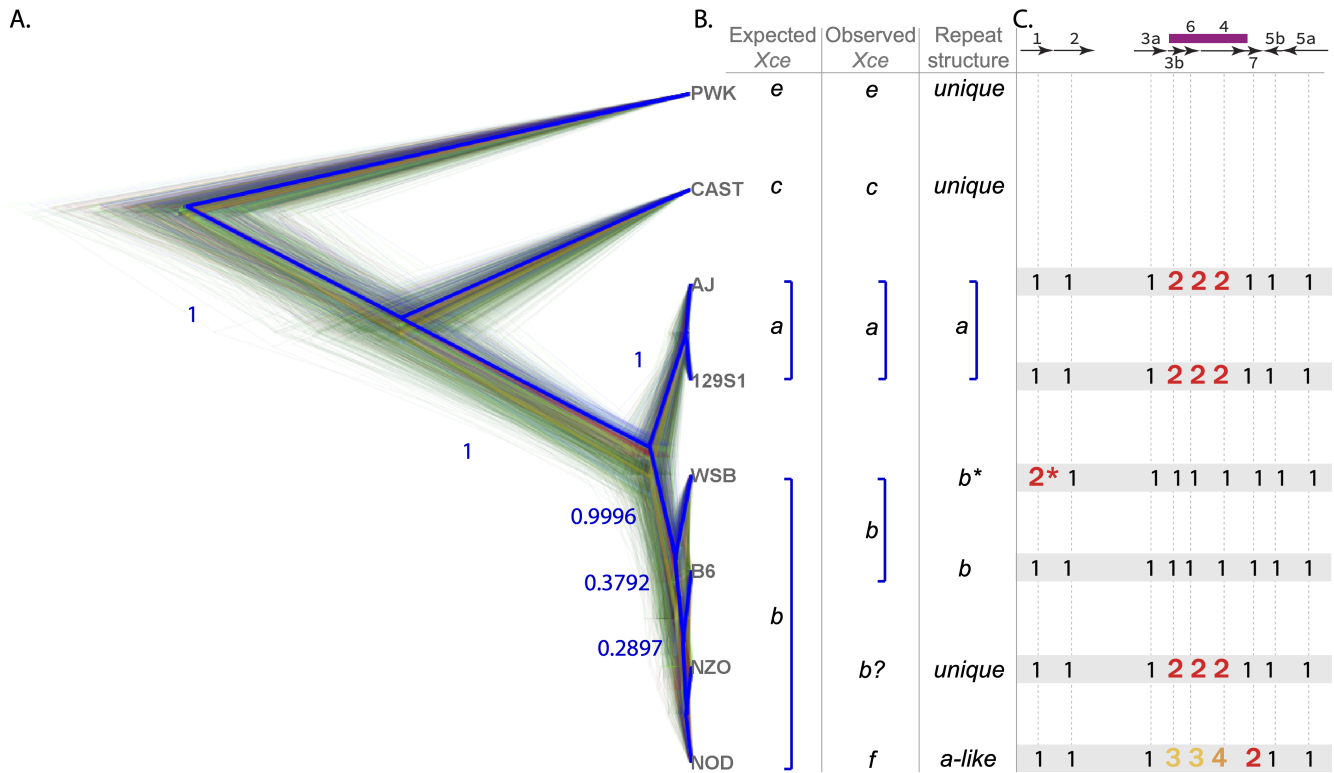

**Figure 9** Phylogenetic tree generated using 8 sequences from the *Xce* interval among the 8 CC founder strains. A) Trees sampled from a Bayesian posterior of phylogenies, with the most frequently occurring topologies in blue, followed by green and red, respectively. The maximum clade credibility tree is shown in a thick blue line and posterior probabilities for each node in this consensus tree are shown next to the branch break point. B) Comparison of the expected *Xce* functional alleles based on haplotype similarity for each of the founder strain, along with observed *Xce* strength and CNV repeat structure. C) Table of the observed number of copies for each SD and I in the *Xce* interval. \*The CNV landscape of WSB/EiJ is similar to that of C57BL/6J except for a small duplication at the proximal end of SD1, which does not appear to affect XCI skewing. The SD and I pattern follow that described by Calaway *et al.* (2013) and Sheedy (2012), expanded to allow for more complicated duplication structures observed across the CC founder strains.

1 crosses of well-described CC strains, and 2) improved mapping  
 2 resolution across the X chromosome from a novel method of  
 3 quantifying ASE in CC-RIX mice and modeling the resulting  
 4 counts in a hierarchical Bayesian manner. The animals repre-  
 5 sented in our study are each mosaics of 8 inbred mouse strains,  
 6 with one X chromosome inherited entirely from each parent.  
 7 Haplotype estimates across the genome in the CC strains are  
 8 stable and replicable, thus allowing us to leverage previously  
 9 collected genotyping and sequencing data to inform ASE esti-  
 10 mates in our dataset. The complete haplotype reconstruction  
 11 across the X chromosome for every cross used in this study is  
 12 depicted in Figure 12.

13 Our methods relied upon a novel way to quantify ASE across  
 14 the X chromosome by querying a set of curated 25-mers among  
 15 the RNA-seq reads from each of the 266 mice in our study popu-  
 16 lation. The 25-mers specifically targeted reference and alternate  
 17 alleles at known polymorphisms in coding regions, and fed  
 18 into a hierarchical Bayesian model to quantify XCI proportion  
 19 for each cross and sample. Among the *Xce* alleles that have  
 20 previously been characterized, our estimated XCI proportions  
 21 matched what we would expect based on data from the litera-  
 22 ture (see Figure 7a). This finding serves to corroborate historical  
 23 observations and to provide validation for our *Xce* imputation  
 24 method and statistical model.

25 We observed highly variable proportions in some crosses,  
 26 potentially owing to multiple sources of variation. Some CC  
 27 strains have segregating boundaries at or near the *Xce* interval,

28 making the assignment of CC strain from which the haplotype  
 29 derives more uncertain, such as near 102.5 Mb in CC062. As  
 30 shown in Figure 12, CC062/CC035 defines the lower boundary  
 31 of the maximum *Xce* interval because the data is consistent with  
 32 the XCI ratio being 50:50, *i.e.* between two *Xce<sup>a</sup>* functional alleles  
 33 of equal strength. In reality, CC062 has a large recombination  
 34 interval between 129S1/SvImJ and NOD near this proximal  
 35 boundary. The broad range of proportions we actually observe  
 36 suggests that *Xce<sup>a</sup>* / *Xce<sup>a</sup>* may not be an appropriate designation  
 37 for every sample in this cross and that some may indeed be  
 38 *Xce<sup>a</sup>* / *Xce<sup>f</sup>*.

39 In addition, we have few samples and crosses with *Xce<sup>e</sup>*  
 40 derived from PWK/PhJ. Our findings suggest that it is similar in  
 41 strength to *Xce<sup>b</sup>* and not demonstrably weaker, consistent with  
 42 previous findings (Calaway *et al.* 2013). As noted in the Methods,  
 43 samples from SP2 had fewer replicates because only the females  
 44 were relevant to this study, potentially leading to more RIX-wide  
 45 variability. Lastly, RNA-seq tissue collection for SP2 used the  
 46 striatum as opposed to whole brain tissue, resulting in a smaller  
 47 starting amount of cells relative to SP1. XCI proportions for in-  
 48 dividuals in SP2 thus had higher variance, leading to less stable  
 49 estimates and larger HPD intervals.

**Pólya urn-based approximation to the number of cells in pre-  
 brain epiblast tissue**

50 Inter-individual variability in XCI skew among genetically-  
 51 identical samples within a RIX cross can be partitioned into  
 52  
 53

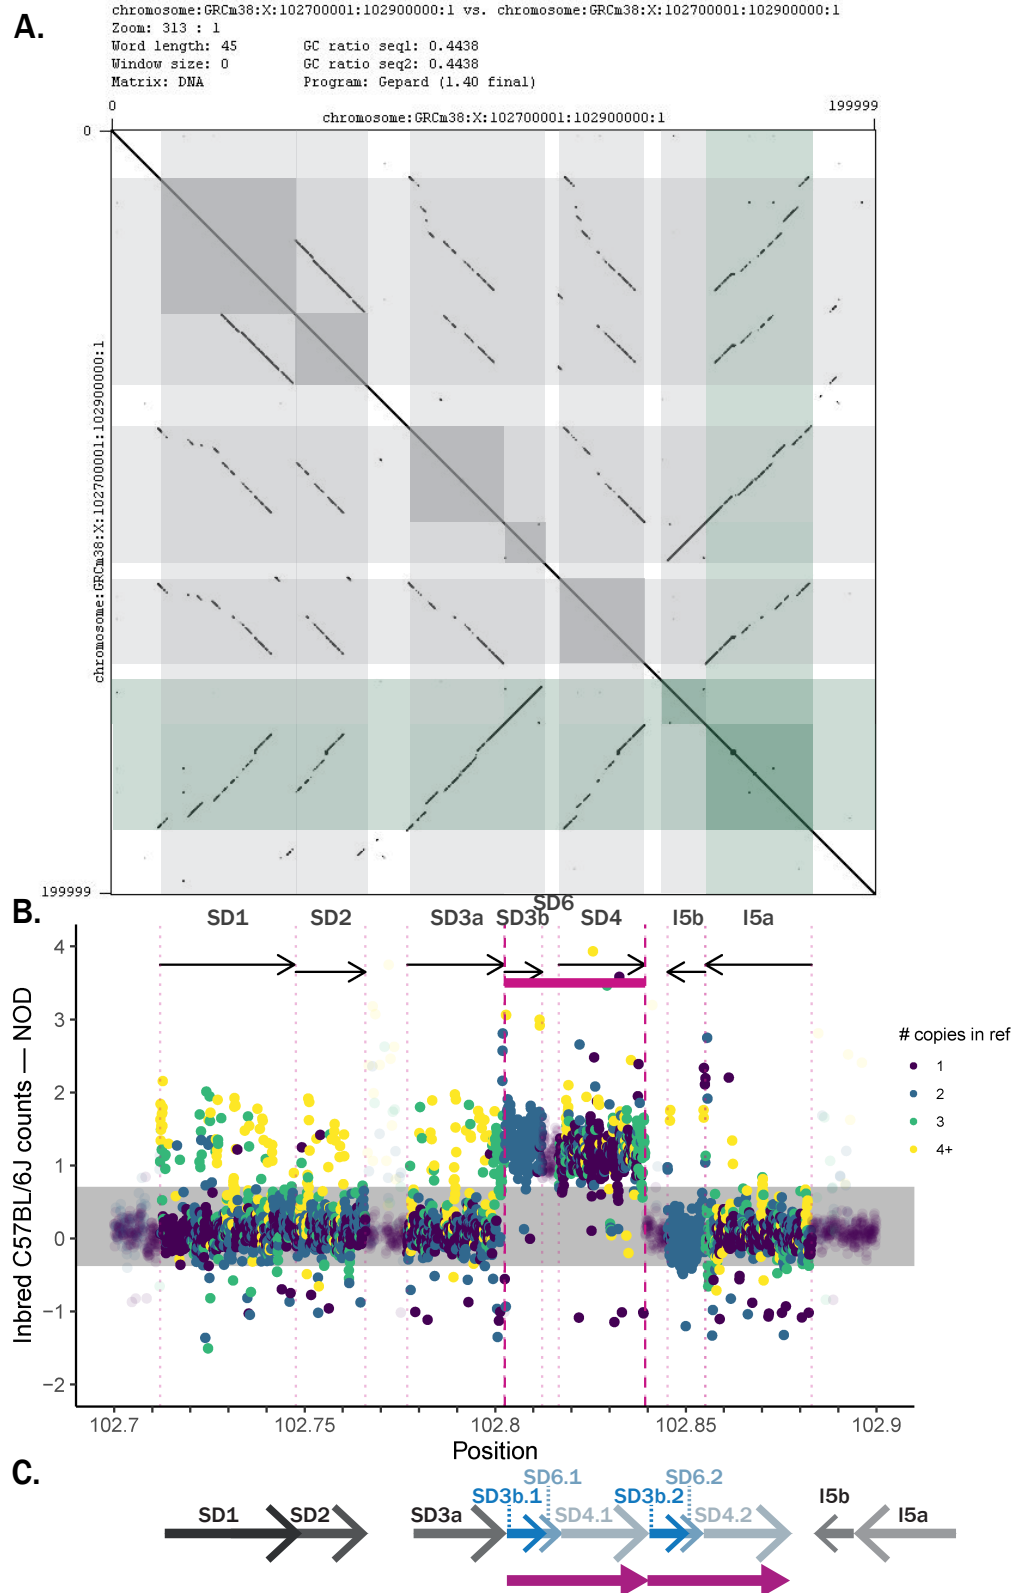

**Figure 10** A) Dotplot of the mouse reference X chromosome from 102.7-102.9 Mb generated from pairwise sequence concordance in the genome assembly. Diagonal lines slanting down from left to right (shaded in gray) are duplications, while diagonal lines from left to right (shaded in green) are inversions. B) Difference in average counts of genomic 45-mers between sequenced samples with *Xce* haplotypes derived from NOD (16 CC strains and 1 inbred NOD) and counts from 24 inbred C57BL/6J strains. Arrows signify duplications (SD1-4) and inversions (I5a-b). There is a clear increase in copy number in the interval marked in magenta, R1. CNV clusters are centered at -0.895, 0.107 (shaded in gray), and 1.311. C) Schematic showing the hypothesized architecture of recurrent duplications and inversions within the *Xce*. The arrows in blue comprise R1, in magenta.

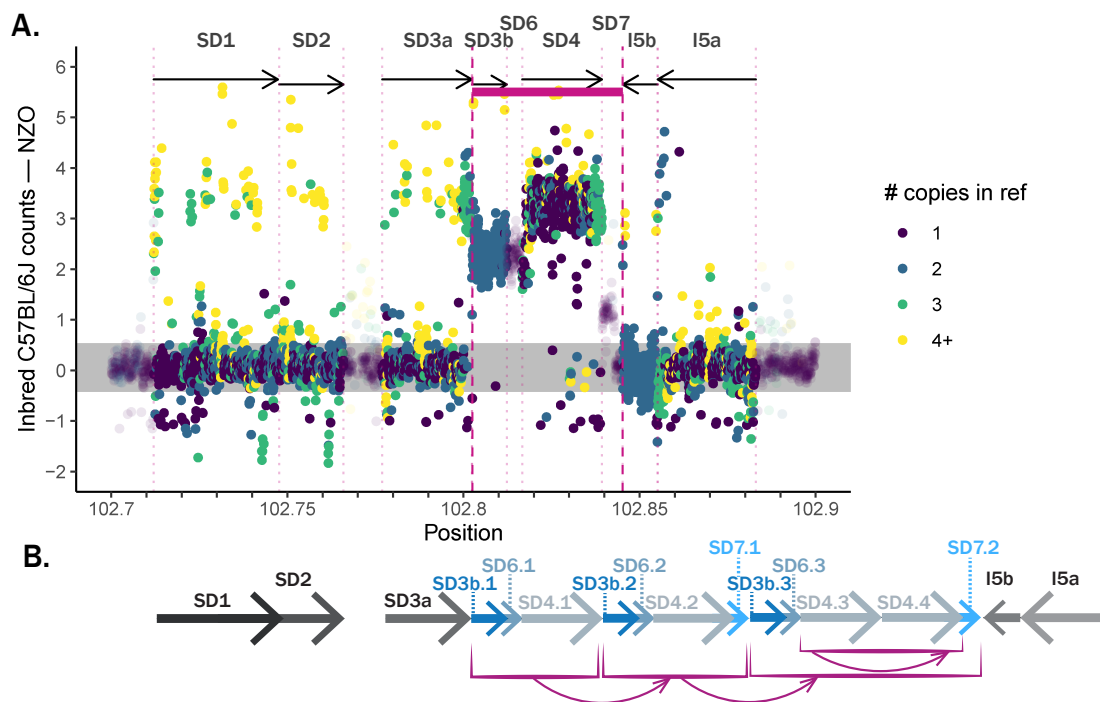

**Figure 11** A) Difference in average counts of genomic 45-mers between sequenced samples with *Xce* haplotypes derived from NZO (7 CC strains and 1 inbred NZO) and counts from 24 inbred C57BL/6J strains. CNV clusters are centered at -0.878, 0.144 (shaded in gray), and 2.947. There are 62 SNPs across the 20 kb interval, 10 of which are in R1 (0.013% of the k-mers in the interval). B) Schematic showing the hypothesized architecture of recurrent duplications and inversions within the *Xce*.

1 experimental and biological variation. Although the two cannot  
 2 be easily disentangled, we surmise that the biological variation  
 3 derives, in part, from the precision of the beta distributed param-  
 4 eter for each estimate of mouse-specific XCI proportion. At the  
 5 point of inactivation choice, the cells in the epiblast are akin to  
 6 balls in a Pólya urn. The Pólya urn describes a random process in  
 7 which an initial number of red and blue balls undergo successive  
 8 rounds of randomly assigned duplications; after infinite rounds,  
 9 the final proportion of red vs blue balls is a random number  
 10 whose variability is a function of the total starting number. Urns  
 11 that start with a greater number of balls are more stable against  
 12 random fluctuations in the proportions of the red to blue balls,  
 13 and have proportions more closely gathered around the starting  
 14 proportion; urns starting with a smaller number lead to a final  
 15 proportion that is more variable.

16 Analogously, the urn represents a RIX and  $\alpha_0$  represents the  
 17 starting number of pluripotent cells that are involved in the de-  
 18 cision to activate either the maternal or paternal chromosome at  
 19 around E5.5 and will eventually form brain tissue (or whichever  
 20 tissue undergoes an ASE assay) in the mature mouse. Though  
 21 we first estimate  $\alpha_0$  in each RIX individually, we assume that the  
 22 parameter should be similar in each individual cross, given the  
 23 stability of biology underlying the XCI process.

24 Though we are unable to verify this quantity of 20-30 pre-  
 25 brain epiblast cells, it does seem reasonable given the total num-  
 26 ber of cells in the epiblast is between 120-660 at E5-6 (Snow  
 27 1977).

28 **Copy number of recurrent duplications may explain the weak-**  
 29 **ness of *Xce<sup>a</sup>* and novel *Xce<sup>f</sup>*, found in NOD**

30 Both NOD and NZO were previously predicted to express  
 31 the *Xce<sup>b</sup>* functional allele based on haplotype similarities to

C57BL/6J. Our results do not support this conclusion in NOD. 32  
 We characterize the *Xce* locus derived from NOD as a separate 33  
 functional allele in the series, *Xce<sup>f</sup>*, because we find it to be 34  
 consistently weaker than all other known *Xce* haplotypes. Crosses 35  
 involving 6 CC strains (CC012, CC023, CC026, CC028, CC041, 36  
 and CC065) that contain the NOD-derived *Xce* region corrobo- 37  
 rate the weakness of the novel *Xce<sup>f</sup>* (Figure 7). This continuity 38  
 leads us to conclude that chromosomes carrying the NOD *Xce* 39  
 allele contain sequence-level variation in this interval, manifest- 40  
 ing in primary inactivation bias against keeping that parental 41  
 copy of the X chromosome active. 42

43 We confirm that both NOD and NZO share sequence simi-  
 44 larity in the *Xce* interval with the reference genome (Figure 9)  
 45 using haplotype assembly from CC WGS and phylogenetic anal-  
 46 ysis. As a result, we conclude that CNV structure may be the  
 47 causative factor for this phenomenon. CNV analysis (Figure 10b)  
 48 reveals a large interval in which the normalized counts for all  
 49 k-mers are consistent with the presence of an extra copy in NOD.  
 50 We tentatively conclude that the repeat, R1, represents a genuine  
 51 copy number increase of a contiguous 37 kb-long segment in  
 52 NOD. R1 includes the entire SD3b and SD4, as well as the bridge  
 53 sequence connecting them that is not duplicated in the reference  
 54 (Figure 10b). The novel R1 appears to be recent; the last dupli-  
 55 cation found in the reference genome is that of SD3a-b inverting  
 56 and inserting distally to form I5a-b, and is demonstrated by the  
 57 sequence similarity between these two sets of sequences in both  
 58 k-mer identity over sliding windows and optical mapping data.  
 59 This general rearrangement structure is similar between two  
 60 weak alleles, *Xce<sup>d</sup>* and *Xce<sup>f</sup>*. A/J and 129S1/SvImJ express *Xce<sup>d</sup>*,  
 61 and both strains share with NOD evidence of the same SD3a-b  
 62 to I5a-b inversion alongside the novel repeat, R1.

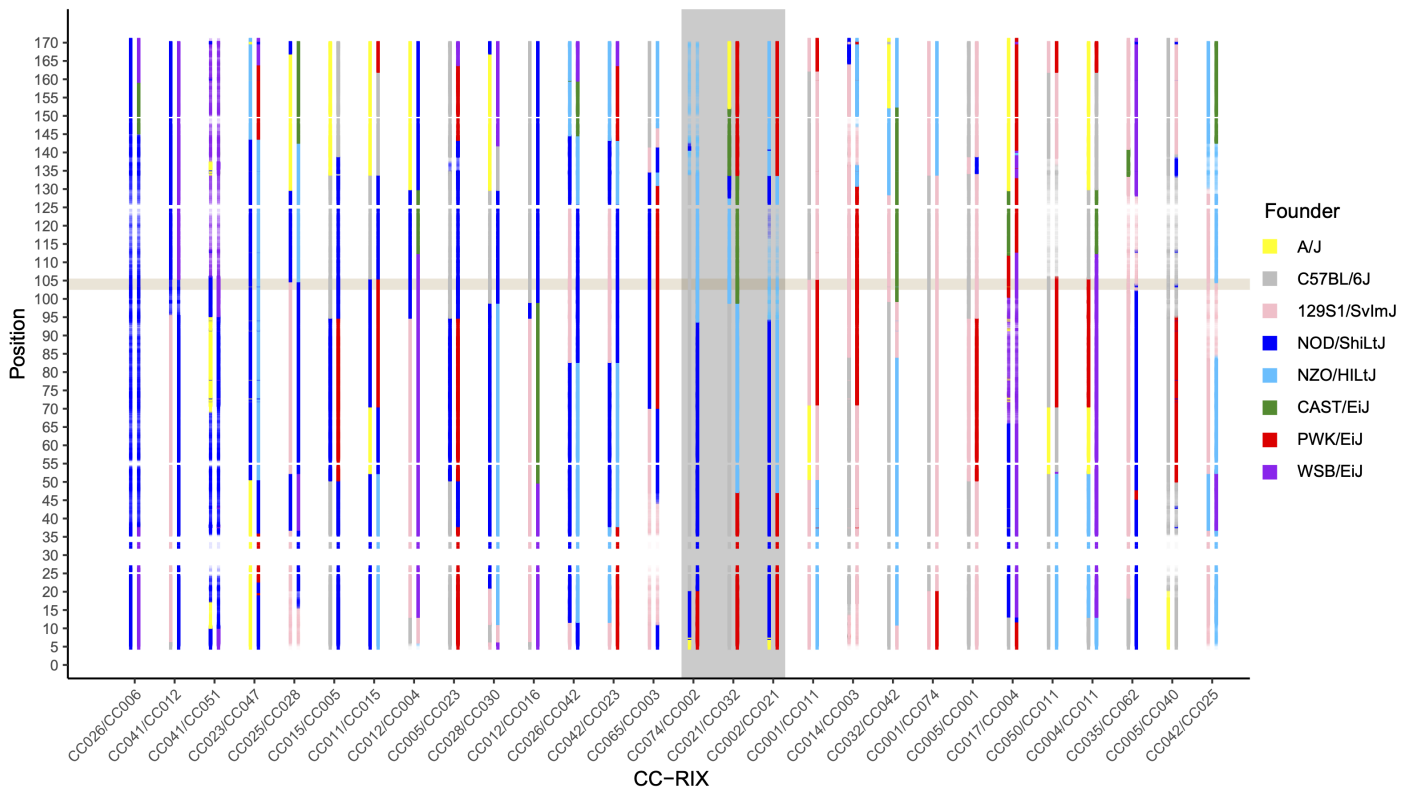

**Figure 12** Heterozygous regions in each CC-RIX line illustrated by the predicted haplotype for each line. Haplotype assignments and their probabilities are represented by the color corresponding to each CC founder and the transparency of the colors, respectively. The 14 crosses in the left, non-shaded area each contain the proposed  $Xce^f$ . The beige highlighted region between 102.5 and 105.6 Mb is consistent with heterozygous regions in these crosses where exactly one founder is shared, namely, NOD. Three crosses in the middle each contain the proposed  $Xce^{NZO}$  and the 11 crosses in the right, non-shaded region contain other  $Xce$  alleles. The highlighted  $Xce$  interval region is consistent with the expected allelic series across the 14 non-NOD crosses and previously proposed  $Xce$  intervals.

### 1 ***NZO expresses $Xce^b$ despite complicated CNV organization***

2 XCI estimates from crosses containing an  $Xce$  region derived  
 3 from NZO do not deviate from our hypothesized ratios based  
 4 on the strain carrying  $Xce^b$ . Whether the XCI proportions seen in  
 5 NZO indicate that its  $Xce$  interval is the same molecular species  
 6 with genuinely identical function as  $Xce^b$ , or if the two pheno-  
 7 types have converged to appear similar is unclear. We would  
 8 expect NZO to have a duplication structure akin to that of the refer-  
 9 ence mouse genome, or at least a different structure to that of  
 10 NOD, A/J, and 129S1/SvImJ. Our analysis of NZO is hampered  
 11 by the lack of CC-RIX in our data with NZO in the putative  $Xce$   
 12 region. One of our main study populations, SP1, was designed  
 13 to maximize heterozygous loci between C57BL/6J and NOD,  
 14 which explains the predominance of both strains in our down-  
 15 stream analysis. Nevertheless, the three RIX that contain NZO  
 16 are consistent with the strain bearing  $Xce^b$  or at least a functional  
 17 allele of the same strength.

18 In NZO, we find a more complex pattern of SD's and I's than  
 19 seen in other strains. As shown in Figure 11, NZO appears to  
 20 harbor one increased copy of SD7, two increased copies of SD3b  
 21 and SD6, and three increased copies of SD4. We confirm the  
 22 increased copy number of these elements by observing novel sets  
 23 of boundaries between SD's that are not present in C57BL/6J,  
 24 NOD, or other strains. For example, NZO contains two distinct  
 25 sets of sequences on the distal end of SD7, suggesting that there  
 26 are two real copies of the segment in the NZO sequence: one of  
 27 which leads into I5b and is present in the C57BL/6J sequence,

and the other of which is novel (see Figure S9).

28  
 29 Thus, the copy number pattern observed in NZO is indeed  
 30 different than what we observe in NOD, A/J and 129S1/SvImJ,  
 31 and the reference genome. NOD and NZO were predicted to  
 32 share the same skewing phenotype as the reference based on  
 33 sequence similarity at the SNP level. Our data demonstrates that  
 34 the NOD  $Xce$  haplotype has a novel functional allele, distinct  
 35 from NZO and any known  $Xce$  allele. CNVs can explain the  
 36 difference between the functional  $Xce$  alleles present in NOD  
 37 and C57BL/6J but they are not able to discriminate between  
 38 NOD and strains with the  $Xce^d$  allele. This is not particularly sur-  
 39 prising given that this simplified approach ignores the potential  
 40 effect of variation outside of the recent NOD duplication and do  
 41 not consider higher order factors associated with duplications  
 42 such as location and orientation of the duplicated segment.

### 43 ***CNV abundance and organization, along with sequence varia- 44 tion, may all play a role in $Xce$ strength and XCI skewing***

45 We do not capture a full portrait of how duplicated segments are  
 46 organized in this complicated region. Copy number may well  
 47 play a role, but there seem to be additional factors distinguishing  
 48 NOD from strains in  $Xce^d$ , as all of these strains appear to contain  
 49 the novel R1. In addition, the duplication structure found in  
 50 NZO is more complex than what we observe in other strains  
 51 yet this does not translate to a detectably different phenotype  
 52 compared with C57BL/6J. This suggests that alternate recurrent  
 53 duplication structures, each containing variations relative to the

reference mouse genome, may present technically different *Xce* species that converge in similar phenotypes. This is supported by phylogenetic analysis showing that A/J and 129S1/SvJ are more similar to each other, while NOD and C57BL/6J evolved separately along another branch. The larger region surrounding the *Xce* contains many other recurrent duplications and repeats, indicating that it is potential "hotspot" of copy number changes (Sheedy 2012). We provide evidence that CNV are important to the *Xce* phenotype and that simply looking at sequence variation is insufficient, but the exact cause and nature of those aberrations remain elusive.

Based on genotyping information collected on the animals in SP1 and from ancestral CC samples, we can map the control element associated with our observed results to a chromosomal location that is consistent with the historical interval as set forth by Calaway *et al.* (2013), Chadwick *et al.* (2006), Simmler *et al.* (1993), and others. In our CNV analysis, we focus on a small portion of this interval near the proximal end from 102.7-102.9 Mb. Our analysis does not preclude the possibility that more distal genomic elements—including sequence variations, CNVs, chromosomal structure, etc.—may also contribute to the function of the element. The immediate region surrounding our putative *Xce* interval is highly duplicated and carries convoluted patterns of CNVs, only a few of which we examined in this study. Further work into the nature of the *Xce* may explore the patterns and inheritance of those rearrangements. For example, some molecular evidence from Sheedy (2012) suggests that a distal duplication distinguishes CAST/EiJ from C57BL/6J. Broader molecular characterization of the extent that CNV plays a role in enacting this control will be required to fully understand the function of *Xce*.

## Acknowledgements

This work was funded by a National Institute of Mental Health (NIMH) grant R01-MH100241 to WV and LMT, NIMH and National Human Genome Research Institute (NHGRI) grants (P50-MH090338, P50-HG006582, and U24-HG010100) to FPMV, and a National Institute of General Medical Sciences (NIGMS) grant R35-GM127000 to WV. KYS also received partial support from the UNC-CH Caroline H. and Thomas S. Royster Fellowship and NIGMS training grant, T32-GM067553. VZ is funded via National Institute of Environmental Health Sciences training grant, T32-ES007018. MiniMUGA was developed under a service contract to FPMV and other investigators at UNC-CH from Neogen Inc., Lincoln, NE. None of the authors have a financial relationship with Neogen Inc. apart from the service contract listed above. The authors have no other conflict of interest to declare. Members of Leonard McMillan's lab at UNC-CH, including Maya Najarian and Sebastian Sigmon, provided guidance with the WGS data and building k-mers. James Xenakis was instrumental in accessing data from SP2. We thank Greg Keele and other members of the Valdar laboratory for helpful discussions and thoughtful comments on the manuscript.

## Literature Cited

Avner, P. and E. Heard, 2001 X-chromosome inactivation: Counting, choice and initiation. *Nature Reviews Genetics* 2: 59–67.  
Balduzzi, S., G. Rücker, and G. Schwarzer, 2019 How to perform a meta-analysis with R: a practical tutorial. *Evidence-Based Mental Health* pp. 153–160.  
Beutler, E., M. Yeh, and V. F. Fairbanks, 1962 The normal human female as a mosaic of X-chromosome activity: studies using

the gene for C-6-PD-deficiency as a marker. *Proceedings of the National Academy of Sciences of the United States of America* 48: 9–16.  
Bouckaert, R., T. G. Vaughan, J. Barido-Sottani, S. Duchêne, M. Fourment, *et al.*, 2019 BEAST 2.5: An advanced software platform for Bayesian evolutionary analysis. *PLoS Computational Biology* 15: e1006650.  
Brockdorff, N., A. Ashworth, G. F. Kay, P. Cooper, S. Smith, *et al.*, 1991 Conservation of position and exclusive expression of mouse *Xist* from the inactive X chromosome. *Nature* 351: 329–331.  
Broman, K. W., D. M. Gatti, P. Simecek, N. A. Furlotte, P. Prins, *et al.*, 2019 R/qtl2: Software for mapping quantitative trait loci with high-dimensional data and multiparent populations. *Genetics* 211: 495–502.  
Brown, C. J., A. Ballabio, J. L. Rupert, R. G. Lafreniere, M. Grompe, *et al.*, 1991 A gene from the region of the human X inactivation centre is expressed exclusively from the inactive X chromosome. *Nature* 349: 38–44.  
Calaway, J. D., A. B. Lenarcic, J. P. Didion, J. R. Wang, J. B. Searle, *et al.*, 2013 Genetic architecture of skewed X inactivation in the laboratory mouse. *PLoS genetics* 9: e1003853.  
Cattanach, B. M., 1970 Controlling elements in the mouse X-chromosome: III. Influence upon both parts of an X divided by rearrangement. *Genetical Research* 16: 293–301.  
Cattanach, B. M. and J. H. Isaacson, 1967 Controlling elements in the mouse X-chromosome. *Genetics* 57: 331–346.  
Cattanach, B. M. and D. Papworth, 1981 Controlling elements in the mouse. V. Linkage tests with X-linked genes. *Genetical research* 38: 57–70.  
Cattanach, B. M., J. N. Perez, and C. E. Pollard, 1970 Controlling elements in the mouse X-chromosome. II. Location in the linkage map. *Genetical research* 15.  
Cattanach, B. M., C. E. Williams, and C. W. BM Cattanach, 1972 Evidence of non-random X chromosome activity in the mouse. *Genetics Research* 19: 229–40.  
Chadwick, L. H., L. M. Pertz, K. W. Broman, M. S. Bartolomei, and H. F. Willard, 2006 Genetic control of X chromosome inactivation in mice: Definition of the *Xce* candidate interval. *Genetics* 173: 2103–2110.  
Collaborative Cross Consortium, 2012 The genome architecture of the collaborative cross mouse genetic reference population. *Genetics* 190: 389–401.  
Crowley, J. J., Y. Kim, A. B. Lenarcic, C. R. Quackenbush, C. J. Barrick, *et al.*, 2014 Genetics of adverse reactions to haloperidol in a mouse diallel: A drug-placebo experiment and Bayesian causal analysis. *Genetics* 196: 321–347.  
Crowley, J. J., V. Zhabotynsky, W. Sun, S. Huang, I. K. Pakatci, *et al.*, 2015 Analyses of allele-specific gene expression in highly divergent mouse crosses identifies pervasive allelic imbalance. *Nature Genetics* 47: 353–360.  
DerSimonian, R. and N. Laird, 1986 Meta-analysis in clinical trials. *Controlled Clinical Trials* 7: 177–188.  
Disteche, C. M. and J. B. Berletch, 2015 X-chromosome inactivation and escape. *Journal of Genetics* 94: 591–599.  
Dossin, F., I. Pinheiro, J. J. Żylicz, J. Roensch, S. Collombet, *et al.*, 2020 SPEN integrates transcriptional and epigenetic control of X-inactivation. *Nature* 578: 455–460.  
Giorgetti, L., B. R. Lajoie, A. C. Carter, M. Attia, Y. Zhan, *et al.*, 2016 Structural organization of the inactive X chromosome in the mouse. *Nature* 535: 575–579.  
Giusti-Rodríguez, P., J. G. Xenakis, J. J. Crowley, R. J. Nonne-



- 1 man, D. M. DeCristo, *et al.*, 2020 Antipsychotic Behavioral Phenotypes in the Mouse Collaborative Cross Recombinant Inbred Inter-Crosses (RIX). G3: Genes, Genomes, Genetics p. g3.400975.2020.
- 2 Hasegawa, M., H. Kishino, and T. aki Yano, 1985 Dating of the human-ape splitting by a molecular clock of mitochondrial DNA. *Journal of Molecular Evolution* **22**: 160–174.
- 3 Holt, J. and L. McMillan, 2014 Merging of multi-string BWTs with applications. *Bioinformatics* **30**: 3524–3531.
- 4 Johnston, P. G. and B. M. Cattanach, 1981 Controlling elements in the mouse. IV. Evidence of non-random X-inactivation. *Genetical research* **37**: 151–60.
- 5 Keane, T. M., L. Goodstadt, P. Danecek, M. A. White, K. Wong, *et al.*, 2011 Mouse genomic variation and its effect on phenotypes and gene regulation. *Nature* **477**: 289–294.
- 6 Krumsiek, J., R. Arnold, and T. Rattei, 2007 Gepard: a rapid and sensitive tool for creating dotplots on genome scale. *Bioinformatics* **23**: 1026–8.
- 7 Larson, N. B., Z. C. Fogarty, M. C. Larson, K. R. Kalli, K. Lawrenson, *et al.*, 2017 An integrative approach to assess X-chromosome inactivation using allele-specific expression with applications to epithelial ovarian cancer. *Genetic Epidemiology* **41**: 898–914.
- 8 Lee, J. T., L. S. Davidow, and D. Warshawsky, 1999a Tsix, a gene antisense to Xist at the X-inactivation centre. *Nature Genetics* **21**: 400–404.
- 9 Lee, J. T., N. Lu, and N. L. JT Lee, 1999b Targeted mutagenesis of Tsix leads to nonrandom X inactivation. *Cell* **99**: 47–57.
- 10 Lee, J. T., W. M. Strauss, J. A. Dausman, and R. Jaenisch, 1996 A 450 kb transgene displays properties of the mammalian X-inactivation center. *Cell* **86**: 83–94.
- 11 Lenarcic, A. B., J. D. Calaway, F. P.-M. de Villena, and W. Valdar, 2018 Bayesian Manifold-Constrained-Prior Model for an Experiment to Locate Xce. *ArXiv* p. 1812.08863.
- 12 Lyon, M. F., 1961 Gene action in the X-chromosome of the mouse (*mus musculus* L.). *Nature* **190**: 372–373.
- 13 Madeira, F., Y. M. Park, J. Lee, N. Buso, T. Gur, *et al.*, 2019 The EMBL-EBI search and sequence analysis tools APIs in 2019. *Nucleic Acids Research* **47**: W636–W641.
- 14 Minajigi, A., J. E. Froberg, C. Wei, H. Sunwoo, B. Kesner, *et al.*, 2015 A comprehensive Xist interactome reveals cohesin repulsion and an RNA-directed chromosome conformation. *Science* **349**: aab2276.
- 15 Minks, J., W. P. Robinson, and C. J. Brown, 2008 A skewed view of X chromosome inactivation. *Journal of Clinical Investigation* **118**: 20–23.
- 16 Morgan, A. P., C. P. Fu, C. Y. Kao, C. E. Welsh, J. P. Didion, *et al.*, 2016 The mouse universal genotyping array: From substrains to subspecies. *G3: Genes, Genomes, Genetics* **6**: 263–279.
- 17 Nesterova, T. B., S. C. Barton, M. A. Surani, and N. Brockdorff, 2001 Loss of Xist imprinting in diploid parthenogenetic preimplantation embryos. *Developmental Biology* **235**: 343–350.
- 18 Nora, E. P., B. R. Lajoie, E. G. Schulz, L. Giorgetti, I. Okamoto, *et al.*, 2012 Spatial partitioning of the regulatory landscape of the X-inactivation centre. *Nature* **485**: 381–385.
- 19 Ogawa, Y. and J. T. Lee, 2003 Xite, X-inactivation intergenic transcription elements that regulate the probability of choice. *Molecular Cell* **11**: 731–743.
- 20 Okamoto, I., A. P. Otte, C. D. Allis, D. Reinberg, and E. Heard, 2004 Epigenetic Dynamics of Imprinted X Inactivation during Early Mouse Development. *Science* **303**: 644–649.
- 21 Oreper, D., S. A. Schoenrock, R. McMullan, R. Ervin, J. Farrington, *et al.*, 2018 Reciprocal F1 Hybrids of Two Inbred Mouse Strains Reveal Parent-of-Origin and Perinatal Diet Effects on Behavior and Expression. *G3: Genes, Genomes, Genetics* **8**: 3447–3468.
- 22 Penny, G. D., G. F. Kay, S. A. Sheardown, S. Rastan, and N. Brockdorff, 1996 Requirement for Xist in X chromosome inactivation. *Nature* **379**: 131–137.
- 23 Percec, I., R. M. Plenge, J. H. Nadeau, M. S. Bartolomei, and H. F. Willard, 2002 Autosomal dominant mutations affecting X inactivation choice in the mouse. *Science* **296**: 1136–1139.
- 24 Plenge, R. M., I. Percec, J. H. Nadeau, and H. F. Willard, 2000 Expression-based assay of an X-linked gene to examine effects of the X-controlling element (Xce) locus. *Mammalian Genome* **11**: 405–408.
- 25 Plummer, M., 2003 JAGS: A Program for Analysis of Bayesian Graphical Models Using Gibbs Sampling. In *Proceedings of the 3rd International Workshop on Distributed Statistical Computing (DSC 2003)*, edited by K. Hornik, F. Leisch, and A. Zeileis, pp. 1–10, Vienna, Austria.
- 26 R Core Team, 2017 *R: A Language and Environment for Statistical Computing*. R Foundation for Statistical Computing, Vienna, Austria.
- 27 Rastan, S., 1982 Timing of X-chromosome inactivation in postimplantation mouse embryos. *Journal of embryology and experimental morphology* **71**: 11–24.
- 28 Schoenrock, S. A., D. Oreper, J. Farrington, R. C. McMullan, R. Ervin, *et al.*, 2018 Perinatal nutrition interacts with genetic background to alter behavior in a parent-of-origin-dependent manner in adult Collaborative Cross mice. *Genes, Brain and Behavior* **17**: e12438.
- 29 Sheedy, C. B., 2012 *Genomic Characterization and Comparative Analysis of the Xce Candidate Region*. Ph.D. thesis, Duke University.
- 30 Shorter, J. R., M. L. Najarian, T. A. Bell, M. Blanchard, M. T. Ferris, *et al.*, 2019 Whole Genome Sequencing and Progress Towards Full Inbreeding of the Mouse Collaborative Cross Population. *G3: Genes, Genomes, Genetics* **9**: 1303–1311.
- 31 Sigmon, J. S., M. Blanchard, R. Baric, T. Bell, J. Brennan, *et al.*, 2020 Content and performance of the MiniMUGA genotyping array, a new tool to improve rigor and reproducibility in mouse research. *bioRxiv* p. 2020.03.12.989400.
- 32 Simmler, M. C., B. M. Cattanach, C. Rasberry, C. Rougeulle, and P. Avner, 1993 Mapping the murine Xce locus with (CA)<sub>n</sub> repeats. *Mammalian Genome* **4**: 523–530.
- 33 Snow, M. H. L., 1977 Gastrulation in the mouse: Growth and regionalization of the epiblast. *Development* **42**.
- 34 Srivastava, A., A. P. Morgan, M. L. Najarian, V. K. Sarsani, J. S. Sigmon, *et al.*, 2017 Genomes of the Mouse Collaborative Cross. *Genetics* **206**: 537–556.
- 35 Takagi, N., 1980 Primary and secondary nonrandom X chromosome inactivation in early female mouse embryos carrying Searle's translocation T(X; 16)16H. *Chromosoma* **81**: 439–459.
- 36 Takagi, N., O. Sugawara, and M. Sasaki, 1982 Regional and temporal changes in the pattern of X-chromosome replication during the early post-implantation development of the female mouse. *Chromosoma* **85**: 275–286.
- 37 Thorvaldsen, J. L., C. Krapp, H. F. Willard, and M. S. Bartolomei, 2012 Nonrandom X chromosome inactivation is influenced by multiple regions on the murine X chromosome. *Genetics* **192**: 1095–1107.
- 38 Venables, W. N. and B. D. Ripley, 2002 *Modern Applied Statistics with S*. Springer, New York, fourth edition, ISBN 0-387-95457-0.

- 1 Wang, X., P. D. Soloway, and A. G. Clark, 2010 Paternally biased  
2 X inactivation in mouse neonatal brain. *Genome biology* **11**:  
3 R79.  
4 Williamson, C., A. Blake, S. Thomas, C. Beechey, J. Hancock,  
5 *et al.*, 2013 Mouse Imprinting Data and References.  
6 Wutz, A., 2011 Gene silencing in X-chromosome inactivation:  
7 Advances in understanding facultative heterochromatin for-  
8 mation. *Nature Reviews Genetics* **12**: 542–553.

## 9 Supporting information

- 10 **Table S1** Summary of all RIX crosses phenotyped in this study,  
11 the number of samples per cross, the CC haplotype imputed in  
12 the *Xce* interval, and the corresponding *Xce* alleles.  
13 **Table S2** Shape, rate, mean, variance, and 95% HPD estimates  
14 for gamma-distributed  $\alpha_0$  posterior distributions from MCMC  
15 run on individual CC-RIX.  
16 **Table S3** Assembled 8 sequences spanning the *Xce* interval gen-  
17 erated from high-coverage CC WGS used to infer the phyloge-  
18 netic relationships between the CC strains based on this region.  
19 **File S1** List of all 266 mouse samples (CSV).  
20 **File S2** Complete data on 7,957 25-mers used to quantify gene  
21 expression on X chromosome (CSV).  
22 **File S3** Posterior mode, mean, median, and 95% highest poste-  
23 rior densities determined by the Bayesian hierarchical model for  
24 all covariates in GLM performed for SP1 and SP2 (CSV).  
25 **File S4** Complete data on non-overlapping genomic 45-mers  
26 used to determine CNV in *Xce* interval (CSV).  
27 **File S5** Individual XCI proportion estimates across X chromo-  
28 some for all 266 samples in study, akin to Figure 6 (PDF).  
29 **Figure S1** DAG showing in detail the parameters of the hierar-  
30 chical model for XCI proportion at the gene-, individual mouse-,  
31 and RIX level. Estimates for the number of day 5 brain pre-  
32 cursor cells ( $\alpha_0$ ) across RIXs are then combined through a post-  
33 processing step.  
34 **Figure S2** Bionano optical mapping alignment for the mouse  
35 reference sequence.  
36 **Figures S3-S8** Counts of 45-mers spanning the proposed *Xce* and  
37 the difference between average counts in the indicated strain  
38 across the interval and counts from inbred C57BL/6J strains.  
39 The following strains are represented, respectively: C57BL/6J,  
40 A/J, 129S1/SvlmJ, CAST/EiJ, PWK/PhJ, WSB/EiJ.  
41 **Figure S9** Counts of k-mers spanning the proximal and distal  
42 ends of SD7 for both C57BL/6J and NZO. Sequence data from  
43 NZO clearly show at least two unique boundaries, suggesting  
44 that SD7 is indeed duplicated in this strain.

## Supplemental Figures and Tables

1

The following pages provide supplemental figures and tables for the manuscript "*Skewed X inactivation in genetically diverse mice is associated with recurrent copy number changes at the Xce locus*" by Sun et al.

2

3

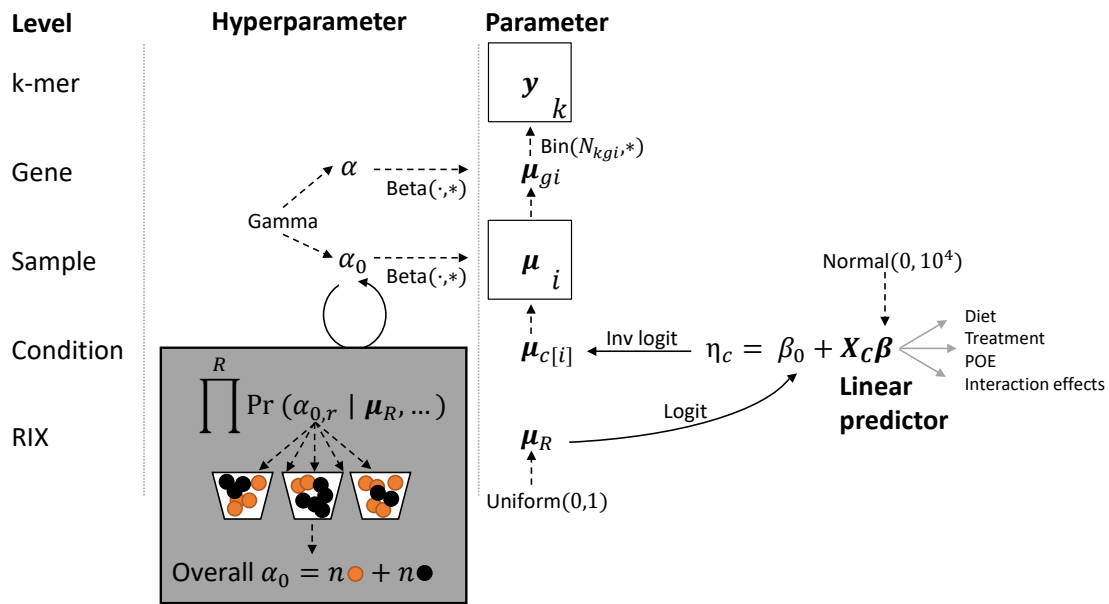

**Figure S1** DAG showing in detail the parameters of the hierarchical model for XCI proportion at the gene-, individual mouse-, and RIX level. Estimates for the number of day 5 brain precursor cells ( $\alpha_0$ ) across RIXs are then combined through a post-processing step. Arrows indicate dependencies between nodes. Dashed arrows are probabilistic dependencies, and labels denote the probability distributions linking the nodes. For distributions with multiple parameters, the star (\*) indicates the parameter of the parent node, and the dot (·) is a placeholder for the other parameter. We use a parameterization of the beta distribution based on mean and precision, as described in the text. Solid arrows are deterministic dependencies, and labels denote the operation linking the nodes.

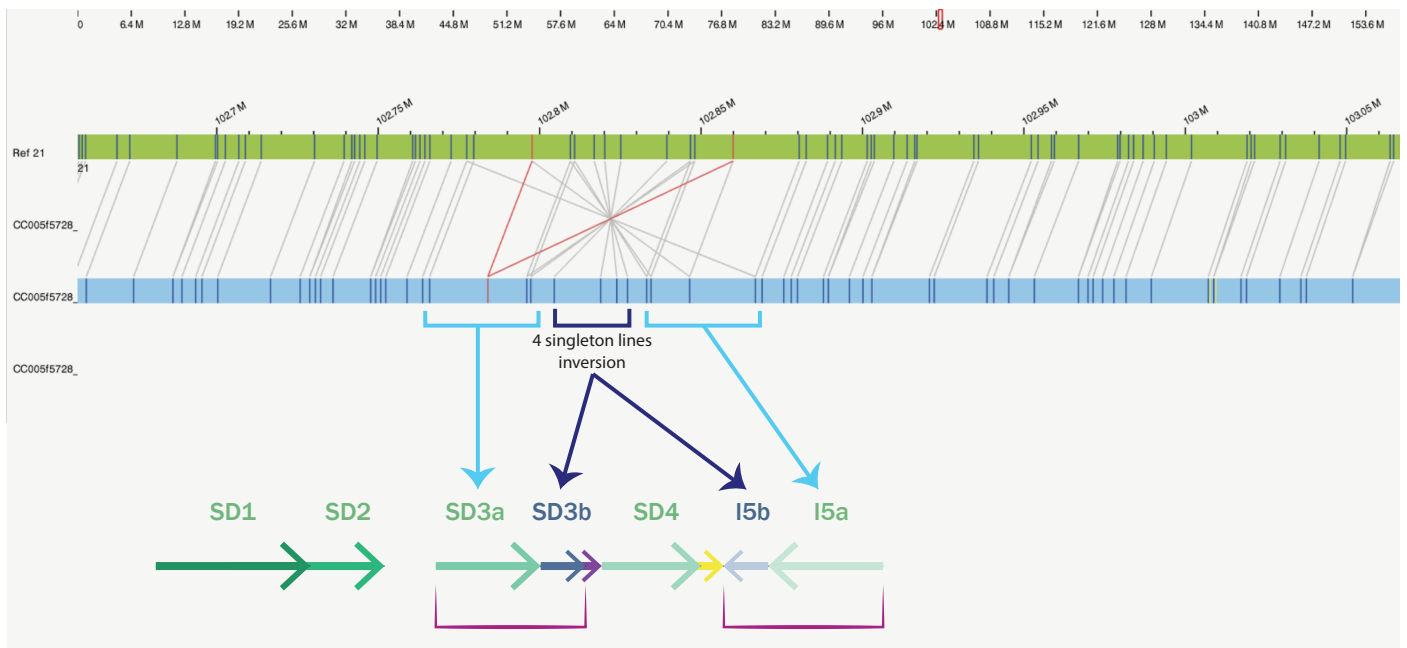

**Figure S2** Bionano optical mapping alignment of the mouse reference sequence (labeled Ref 21) and CC005, which has a C57BL/6J-derived *Xce* region. Lines connecting the two sequences represent shared markers, and the red line linking one marker on CC005 and two on Ref 21 indicates that the marker on CC005 shows up twice in the reference. The shared lines in the marked region line up with the known duplication and inversion structure in C57BL/6J (blue arrows), and suggests that SD3a-b inverts and duplicates to form I5a-b.

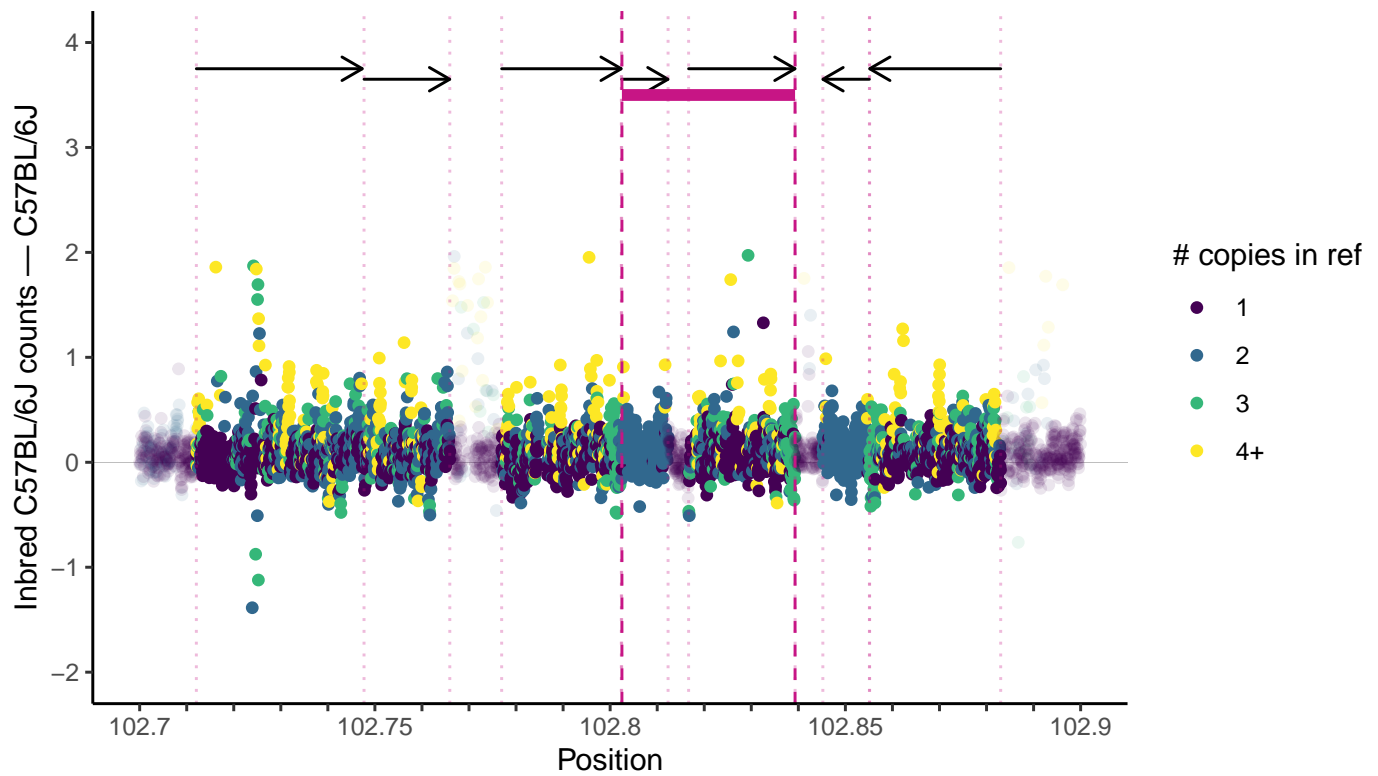

**Figure S3** Counts of genomic 45-mers spanning the proposed *Xce*: difference between average counts across the interval in sequenced mice with haplotypes derived from C57BL/6J (10 CC strains) and counts from 24 inbred C57BL/6J mice.

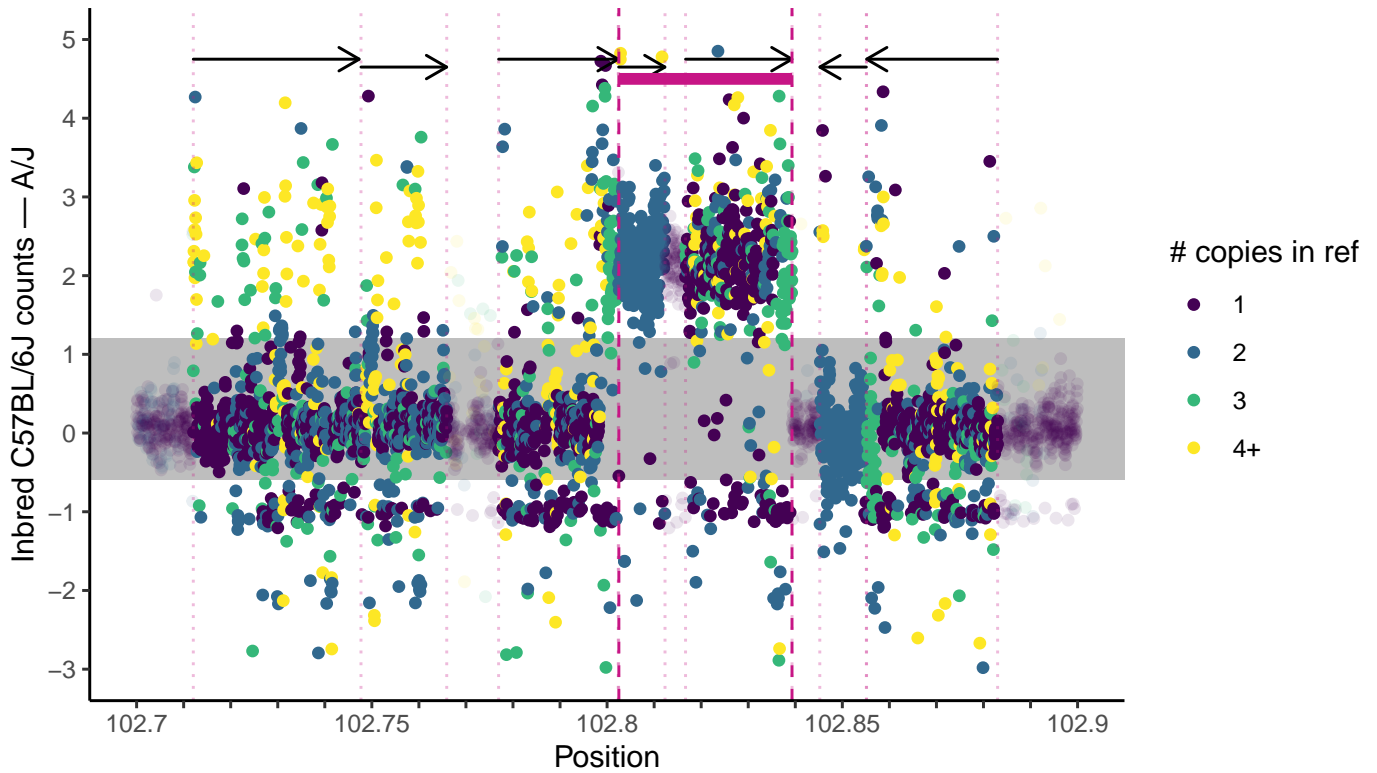

**Figure S4** Counts of genomic 45-mers spanning the proposed *Xce*: difference between average counts across the interval in sequenced mice with haplotypes derived from A/J (4 CC strains and one inbred A/J representative) and counts from 24 inbred C57BL/6J mice.

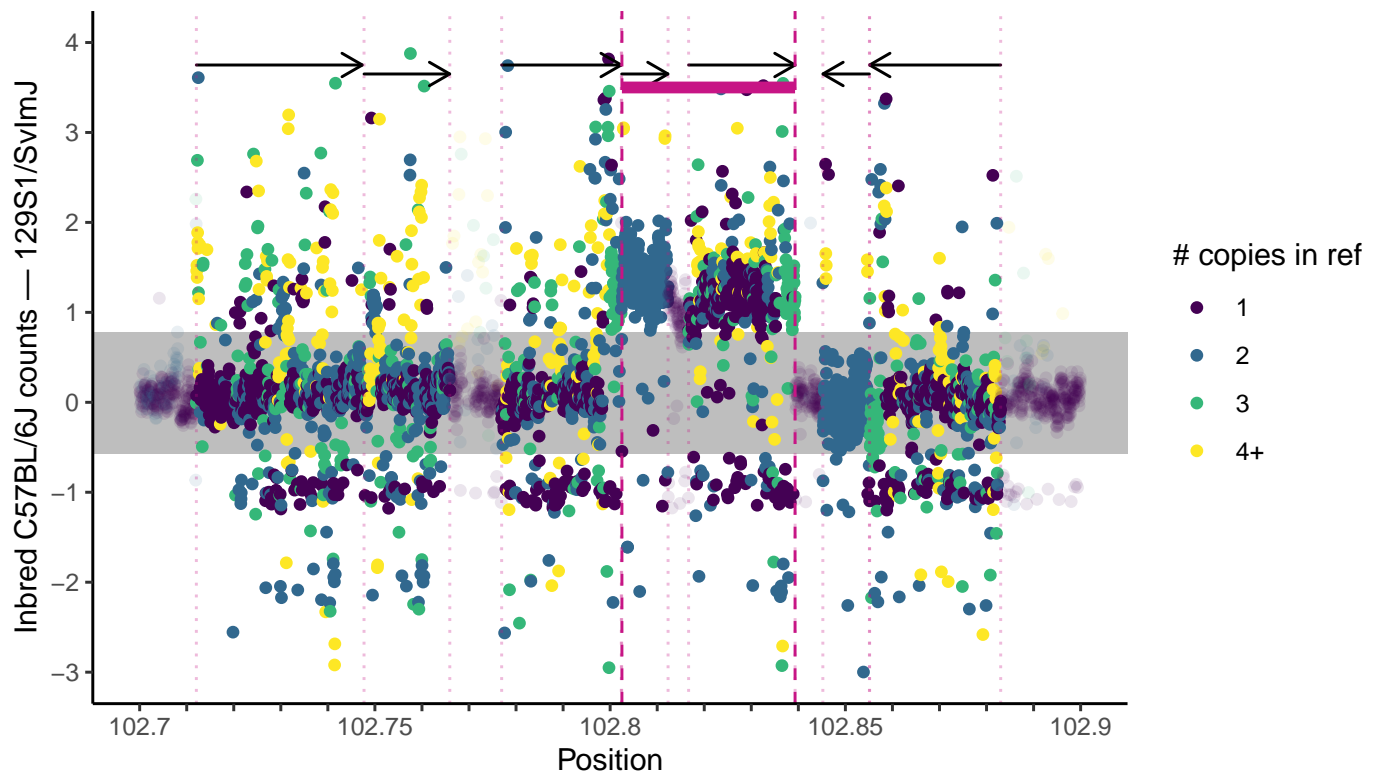

**Figure S5** Counts of genomic 45-mers spanning the proposed *Xce*: difference between average counts across the interval in sequenced mice with haplotypes derived from 129S1/SvImJ (15 CC strains and one inbred 129S1/SvImJ representative) and counts from 24 inbred C57BL/6J mice.



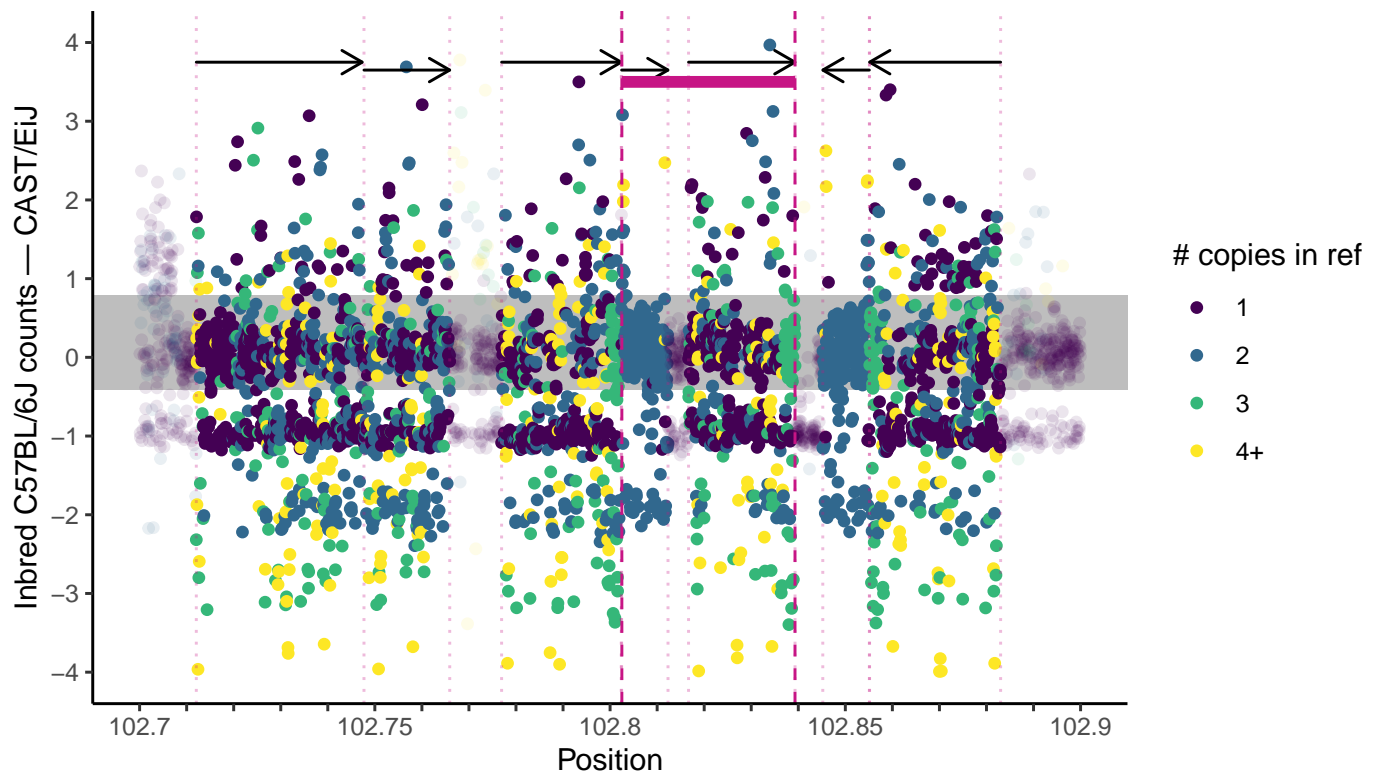

**Figure S6** Counts of genomic 45-mers spanning the proposed *Xce*: difference between average counts across the interval in sequenced mice with haplotypes derived from CAST/EiJ (3 CC strains and one inbred CAST/EiJ representative) and counts from 24 inbred C57BL/6J mice.

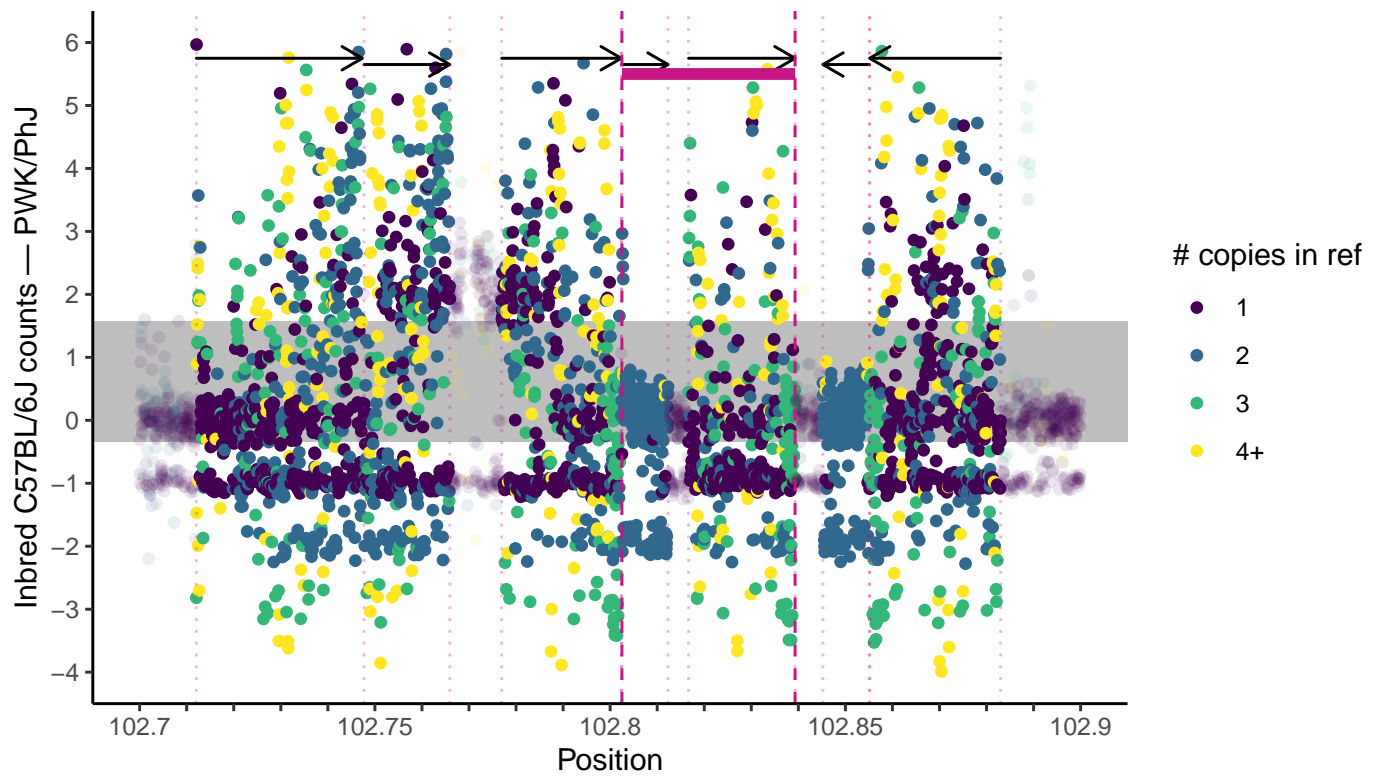

**Figure S7** Counts of genomic 45-mers spanning the proposed *Xce*: difference between average counts across the interval in sequenced mice with haplotypes derived from PWK/PhJ (2 CC strains and one inbred PWK/PhJ representative) and counts from 24 inbred C57BL/6J mice.

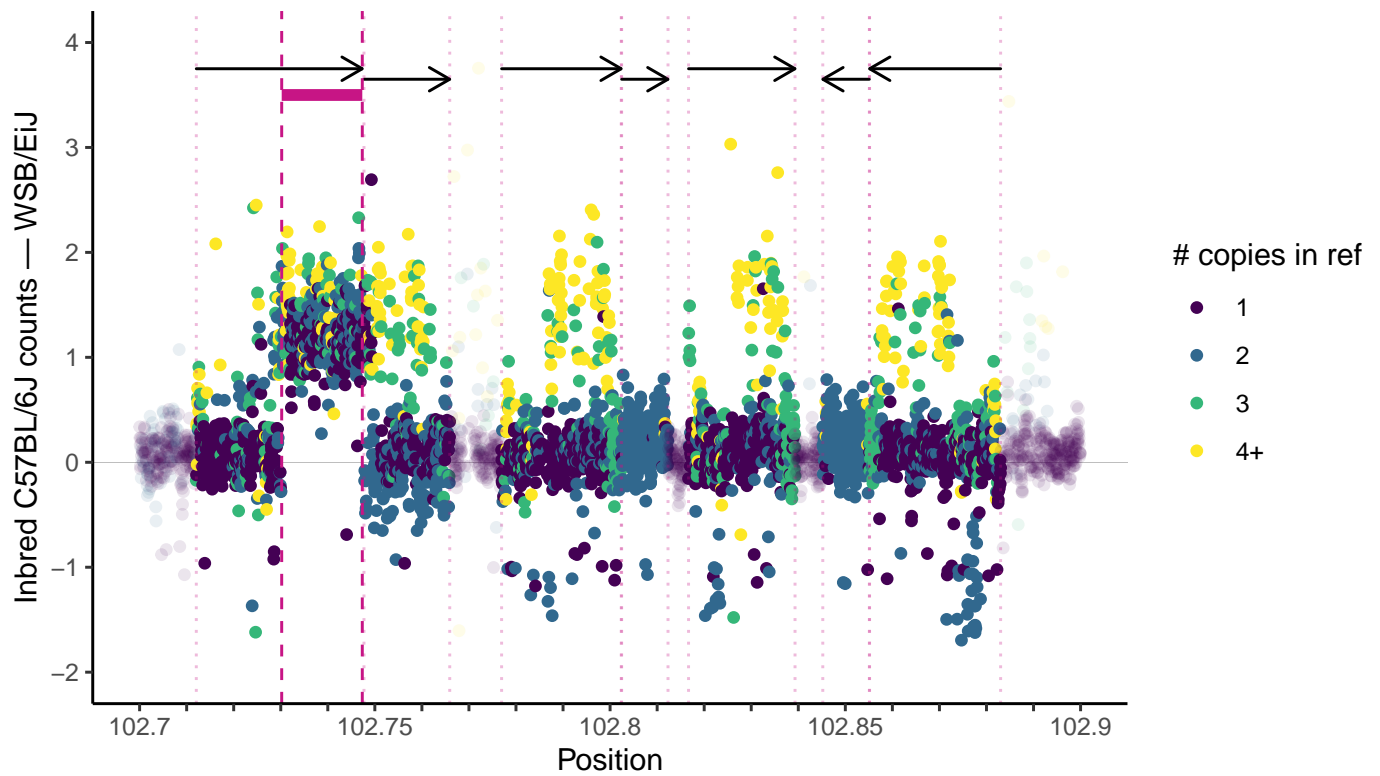

**Figure S8** Counts of genomic 45-mers spanning the proposed *Xce*: difference between average counts across the interval in sequenced mice with haplotypes derived from WSB/EiJ (7 CC strains and one inbred WSB/EiJ representative) and counts from 24 inbred C57BL/6J mice.



| CC strains  | Dam x Sire  | CC1            | CC2           | Xce 1 | Xce 2 | Xce 1 | Xce 2 | k-mers | n  | Mode   | Mean   | Median | Lower  | Upper  |
|-------------|-------------|----------------|---------------|-------|-------|-------|-------|--------|----|--------|--------|--------|--------|--------|
| CC015/CC011 | CC011xCC015 | CC011/Unc      | CC015/Unc     | G     | D     | e     | f     | 61435  | 2  | 0.2555 | 0.2403 | 0.2369 | 0.1588 | 0.3266 |
| CC023/CC005 | CC005xCC023 | CC005/TauUnc   | CC023/GeniUnc | B     | D     | b     | f     | 72783  | 3  | 0.1792 | 0.1761 | 0.1744 | 0.1289 | 0.2253 |
| CC015/CC005 | CC015xCC005 | CC015/Unc      | CC005/TauUnc  | D     | B     | f     | b     | 46483  | 3  | 0.4800 | 0.3810 | 0.3789 | 0.2659 | 0.4919 |
| CC021/CC002 | CC002xCC021 | CC002/Unc      | CC021/Unc     | E     | E     | b     | b     | 35949  | 3  | 0.4148 | 0.4000 | 0.3993 | 0.3117 | 0.4852 |
| CC026/CC042 | CC026xCC042 | CC026/GeniUnc  | CC042/GeniUnc | D     | C     | f     | a     | 3293   | 4  | 0.2687 | 0.2378 | 0.2372 | 0.1680 | 0.3037 |
| CC012/CC016 | CC012xCC016 | CC012/GeniUnc  | CC016/GeniUnc | D     | B     | f     | b     | 44224  | 4  | 0.3981 | 0.3954 | 0.3951 | 0.3556 | 0.4369 |
| CC028/CC030 | CC028xCC030 | CC028/GeniUnc  | CC030/GeniUnc | D     | B     | f     | b     | 10158  | 4  | 0.4627 | 0.4593 | 0.4589 | 0.3709 | 0.5478 |
| CC065/CC003 | CC065xCC003 | CC065/Unc      | CC003/Unc     | D     | G     | f     | e     | 63007  | 4  | 0.3284 | 0.3518 | 0.3509 | 0.2929 | 0.4134 |
| CC025/CC042 | CC042xCC025 | CC042/GeniUnc  | CC025/GeniUnc | C     | C     | a     | a     | 5289   | 4  | 0.4121 | 0.4043 | 0.4027 | 0.3245 | 0.4867 |
| CC011/CC050 | CC050xCC011 | CC050/Unc      | CC011/Unc     | B     | G     | b     | e     | 36163  | 4  | 0.5443 | 0.5240 | 0.5243 | 0.4315 | 0.6207 |
| CC028/CC025 | CC025xCC028 | CC025/GeniUnc  | CC028/GeniUnc | C     | D     | a     | f     | 41966  | 5  | 0.3859 | 0.4078 | 0.4062 | 0.2924 | 0.5246 |
| CC012/CC004 | CC012xCC004 | CC012/GeniUnc  | CC004/TauUnc  | D     | H     | f     | b     | 17378  | 5  | 0.2186 | 0.2319 | 0.2300 | 0.1718 | 0.2946 |
| CC002/CC074 | CC074xCC002 | CC074/Unc      | CC002/Unc     | B     | E     | b     | b     | 43686  | 5  | 0.5173 | 0.5213 | 0.5218 | 0.4199 | 0.6240 |
| CC021/CC032 | CC021xCC032 | CC021/Unc      | CC032/GeniUnc | E     | F     | b     | c     | 109128 | 5  | 0.3900 | 0.3745 | 0.3741 | 0.3135 | 0.4392 |
| CC011/CC004 | CC004xCC011 | CC004/TauUnc   | CC011/Unc     | H     | G     | b     | e     | 66858  | 5  | 0.5069 | 0.4855 | 0.4854 | 0.4555 | 0.5150 |
| CC012/CC041 | CC041xCC012 | CC041/TauUnc   | CC012/GeniUnc | D     | D     | f     | f     | 11886  | 6  | 0.5892 | 0.6033 | 0.6053 | 0.4890 | 0.7124 |
| CC001/CC074 | CC001xCC074 | CC001/Unc      | CC074/Unc     | C     | B     | a     | b     | 68128  | 6  | 0.3679 | 0.3834 | 0.3823 | 0.3081 | 0.4634 |
| CC001/CC005 | CC005xCC001 | CC005/TauUnc   | CC001/Unc     | B     | C     | b     | a     | 52857  | 6  | 0.3677 | 0.3463 | 0.3449 | 0.2771 | 0.4169 |
| CC023/CC042 | CC042xCC023 | CC042/GeniUnc  | CC023/GeniUnc | C     | D     | a     | f     | 28100  | 7  | 0.2744 | 0.2394 | 0.2382 | 0.1875 | 0.2941 |
| CC062/CC035 | both        | CC035/UncI     | CC062/Unc     | C     | C     | a     | a     | 176572 | 12 | 0.4196 | 0.4600 | 0.4596 | 0.3737 | 0.5513 |
| CC014/CC003 | both        | CC014/Unc      | CC003/Unc     | C     | G     | a     | e     | 233962 | 12 | 0.3276 | 0.3475 | 0.3467 | 0.2888 | 0.4129 |
| CC023/CC047 | both        | CC023/GeniUncI | CC047/Unc     | D     | E     | f     | b     | 116546 | 16 | 0.2102 | 0.2518 | 0.2507 | 0.2019 | 0.3036 |
| CC040/CC005 | both        | CC005/TauUnc   | CC040/TauUnc  | B     | B     | b     | b     | 199704 | 16 | 0.4733 | 0.4883 | 0.4881 | 0.4500 | 0.5273 |
| CC006/CC026 | both        | CC026/GeniUnc  | CC006/TauUnc  | D     | D     | f     | f     | 134963 | 20 | 0.5059 | 0.5121 | 0.5125 | 0.4645 | 0.5601 |
| CC042/CC032 | both        | CC032/GeniUncI | CC042/GeniUnc | F     | C     | c     | a     | 270546 | 22 | 0.2984 | 0.3081 | 0.3080 | 0.2807 | 0.3359 |
| CC001/CC011 | both        | CC001/Unc      | CC011/Unc     | C     | G     | a     | e     | 140197 | 24 | 0.3094 | 0.3138 | 0.3138 | 0.2861 | 0.3438 |
| CC041/CC051 | both        | CC041/TauUnc   | CC051/TauUnc  | D     | H     | f     | b     | 19597  | 27 | 0.2176 | 0.2201 | 0.2199 | 0.1902 | 0.2524 |
| CC017/CC004 | both        | CC017/UncI     | CC004/TauUnc  | G/H   | H     | e/b   | b     | 419031 | 32 | 0.4432 | 0.4296 | 0.4294 | 0.3988 | 0.4610 |

**Table S1** Summary of all RIX crosses phenotyped in this study, the number of samples per cross, the CC haplotype imputed in the Xce interval (first Xce 1-2 column), and the corresponding Xce alleles (second Xce 1-2 column).

| RIX         | Shape    | Rate   | SP | Mean     | Var        | Lower   | Upper    |
|-------------|----------|--------|----|----------|------------|---------|----------|
| CC001/CC011 | 8.4312   | 0.1636 | 1  | 51.5364  | 315.0213   | 22.8404 | 91.7086  |
| CC041/CC051 | 7.9745   | 0.2073 | 1  | 38.4634  | 185.5208   | 16.5788 | 69.3987  |
| CC017/CC004 | 13.2852  | 0.3512 | 1  | 37.8331  | 107.7394   | 20.3036 | 60.7270  |
| CC023/CC047 | 8.6800   | 0.4467 | 1  | 19.4306  | 43.4965    | 8.7338  | 34.3314  |
| CC026/CC006 | 10.3473  | 0.4592 | 1  | 22.5339  | 49.0736    | 10.9658 | 38.1977  |
| CC014/CC003 | 6.8406   | 0.3285 | 1  | 20.8238  | 63.3904    | 8.2642  | 39.0861  |
| CC035/CC062 | 6.9248   | 0.6535 | 1  | 10.5966  | 16.2153    | 4.2346  | 19.8256  |
| CC032/CC042 | 7.3819   | 0.1195 | 1  | 61.7566  | 516.6535   | 25.5637 | 113.6351 |
| CC005/CC040 | 6.7684   | 0.1324 | 1  | 51.1223  | 386.1305   | 20.1660 | 96.2263  |
| CC001/CC074 | 3.6335   | 0.1091 | 2  | 33.2942  | 305.0778   | 8.3261  | 75.2418  |
| CC002/CC021 | 1.8923   | 0.0232 | 2  | 81.6319  | 3521.5712  | 9.0411  | 232.2440 |
| CC004/CC011 | 2.8864   | 0.0082 | 2  | 352.6076 | 43075.2195 | 69.6692 | 860.4619 |
| CC005/CC001 | 3.5568   | 0.0856 | 2  | 41.5597  | 485.6076   | 10.1877 | 94.5724  |
| CC005/CC023 | 1.9148   | 0.0121 | 2  | 158.3470 | 13094.8564 | 17.8825 | 448.4713 |
| CC011/CC015 | 1.4407   | 0.0113 | 2  | 127.3592 | 11258.3650 | 8.4105  | 403.3653 |
| CC012/CC004 | 2.8068   | 0.0502 | 2  | 55.8607  | 1111.7501  | 10.6902 | 137.6402 |
| CC012/CC016 | 2.3582   | 0.0096 | 2  | 245.3774 | 25532.1567 | 37.7787 | 643.1432 |
| CC015/CC005 | 2.1236   | 0.0527 | 2  | 40.2684  | 763.5644   | 5.3449  | 109.6870 |
| CC021/CC032 | 3.0526   | 0.0443 | 2  | 68.8381  | 1552.3221  | 14.4659 | 164.8006 |
| CC025/CC028 | 3.2856   | 0.1864 | 2  | 17.6224  | 94.5177    | 3.9980  | 41.1598  |
| CC026/CC042 | 1.3012   | 0.0126 | 2  | 103.0813 | 8166.1341  | 5.3966  | 340.3386 |
| CC028/CC030 | 2.4640   | 0.0494 | 2  | 49.8899  | 1010.1626  | 8.1401  | 128.7100 |
| CC041/CC012 | 3.8042   | 0.2583 | 2  | 14.7286  | 57.0247    | 3.8405  | 32.7989  |
| CC042/CC023 | 3.9013   | 0.0821 | 2  | 47.5361  | 579.2110   | 12.6746 | 105.0137 |
| CC042/CC025 | 2.1192   | 0.0325 | 2  | 65.2451  | 2008.7430  | 8.6332  | 177.8599 |
| CC050/CC011 | 2.5690   | 0.0606 | 2  | 42.4150  | 700.2869   | 7.2981  | 107.8075 |
| CC065/CC003 | 2.4580   | 0.0245 | 2  | 100.4102 | 4101.8562  | 16.3313 | 259.2731 |
| CC074/CC002 | 3.1555   | 0.1246 | 2  | 25.3247  | 203.2434   | 5.5120  | 59.9535  |
| SP 1 sum    | 68.6338  | 2.8619 | 1  | 23.9819  | 8.3797     | 18.6461 | 29.9789  |
| SP 2 sum    | 32.7237  | 1.2374 | 2  | 26.4462  | 21.3729    | 18.1730 | 36.2469  |
| Overall sum | 100.3575 | 4.0993 |    | 24.4818  | 5.9722     | 19.9271 | 29.4983  |

**Table S2** Shape, rate, mean, variance, and 95% HPD estimates for gamma-distributed  $\alpha_0$  posterior distributions from MCMC run on individual CC-RIX.

| Chr   | Start     | End       | Size  | Distance |
|-------|-----------|-----------|-------|----------|
| X     | 102765816 | 102768746 | 2,930 |          |
| X     | 102776093 | 102776818 | 725   | 7,347    |
| X     | 102812401 | 102813515 | 1,114 | 35,583   |
| X     | 102817750 | 102818206 | 456   | 4,235    |
| X     | 102844171 | 102845363 | 1,192 | 25,965   |
| X     | 102887236 | 102887970 | 734   | 41,873   |
| X     | 102893231 | 102894295 | 1,064 | 5,261    |
| X     | 102910231 | 102910974 | 743   | 15,936   |
| Total |           |           | 8,215 |          |

**Table S3** Assembled 8 sequences spanning the *Xce* interval generated from high-coverage CC WGS used to infer the phylogenetic relationships between the CC strains based on this region.
